# Supplementary material for: Increased burden of cardiovascular disease in people with liver disease: unequal geographical variations, risk factors and excess years of life lost
Source: Springer Nature journal article supplement (doi:10.1186/s12967-021-03210-9), 2022-01-03

### Additional file 3. Excess years life lost (YLL) attributable to CVD in patients with liver disease separated by sex.

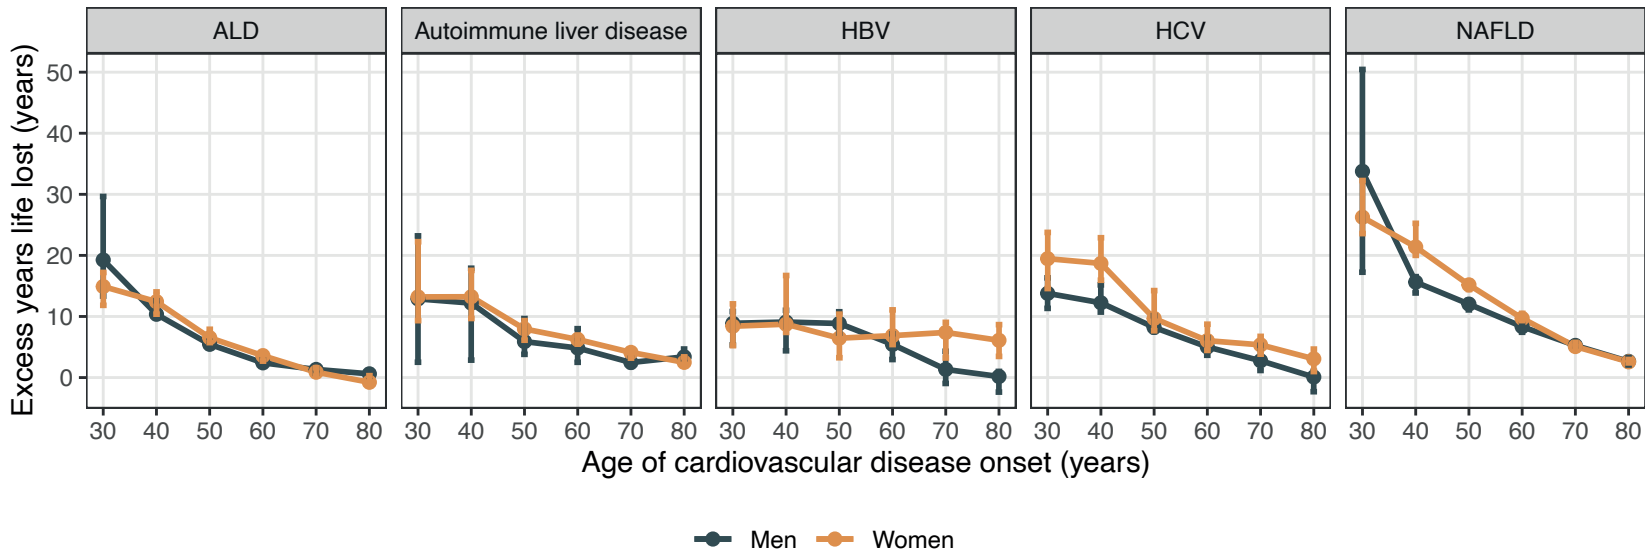

Supplement: MOESM3 [file 19991640]
