# Supplementary material for: Increased burden of cardiovascular disease in people with liver disease: unequal geographical variations, risk factors and excess years of life lost
Source: Springer Nature journal article supplement (doi:10.1186/s12967-021-03210-9), 2022-01-03
Supplement: MOESM4 [file 19991640]

Additional file 4. Baseline characteristics for patients with liver disease

|                                          | ALD                  |                      |                      | Autoimmune liver disease |                      |                      | HBV                  |                      |                      | HCV                  |                      |                      | NAFLD                |                      |                      |
|------------------------------------------|----------------------|----------------------|----------------------|--------------------------|----------------------|----------------------|----------------------|----------------------|----------------------|----------------------|----------------------|----------------------|----------------------|----------------------|----------------------|
|                                          | Men                  | Women                | Overall              | Men                      | Women                | Overall              | Men                  | Women                | Overall              | Men                  | Women                | Overall              | Men                  | Women                | Overall              |
| n                                        | 8560                 | 4285                 | 12845                | 482                      | 1728                 | 2210                 | 1019                 | 734                  | 1753                 | 2135                 | 977                  | 3112                 | 10751                | 10177                | 20928                |
| Practice region (%)                      |                      |                      |                      |                          |                      |                      |                      |                      |                      |                      |                      |                      |                      |                      |                      |
| North East                               | 285 (3.3)            | 141 (3.3)            | 426 (3.3)            | 12 (2.5)                 | 65 (3.8)             | 77 (3.5)             | 17 (1.7)             | 12 (1.6)             | 29 (1.7)             | 52 (2.4)             | 24 (2.5)             | 76 (2.4)             | 301 (2.8)            | 318 (3.1)            | 619 (3.0)            |
| North West                               | 1929 (22.5)          | 1007 (23.5)          | 2936 (22.9)          | 87 (18.0)                | 343 (19.8)           | 430 (19.5)           | 199 (19.5)           | 123 (16.8)           | 322 (18.4)           | 537 (25.2)           | 214 (21.9)           | 751 (24.1)           | 2238 (20.8)          | 2045 (20.1)          | 4283 (20.5)          |
| Yorkshire & The Humber                   | 374 (4.4)            | 200 (4.7)            | 574 (4.5)            | 16 (3.3)                 | 92 (5.3)             | 108 (4.9)            | 26 (2.6)             | 21 (2.9)             | 47 (2.7)             | 81 (3.8)             | 32 (3.3)             | 113 (3.6)            | 386 (3.6)            | 358 (3.5)            | 744 (3.6)            |
| East Midlands                            | 327 (3.8)            | 174 (4.1)            | 501 (3.9)            | 23 (4.8)                 | 66 (3.8)             | 89 (4.0)             | 26 (2.6)             | 27 (3.7)             | 53 (3.0)             | 69 (3.2)             | 40 (4.1)             | 109 (3.5)            | 306 (2.8)            | 292 (2.9)            | 598 (2.9)            |
| West Midlands                            | 1065 (12.4)          | 550 (12.8)           | 1615 (12.6)          | 47 (9.8)                 | 188 (10.9)           | 235 (10.6)           | 87 (8.5)             | 79 (10.8)            | 166 (9.5)            | 162 (7.6)            | 79 (8.1)             | 241 (7.7)            | 992 (9.2)            | 946 (9.3)            | 1938 (9.3)           |
| East of England                          | 758 (8.9)            | 390 (9.1)            | 1148 (8.9)           | 54 (11.2)                | 182 (10.5)           | 236 (10.7)           | 84 (8.2)             | 61 (8.3)             | 145 (8.3)            | 206 (9.6)            | 104 (10.6)           | 310 (10.0)           | 1010 (9.4)           | 966 (9.5)            | 1976 (9.4)           |
| South West                               | 1074 (12.5)          | 517 (12.1)           | 1591 (12.4)          | 65 (13.5)                | 218 (12.6)           | 283 (12.8)           | 118 (11.6)           | 70 (9.5)             | 188 (10.7)           | 299 (14.0)           | 147 (15.0)           | 446 (14.3)           | 1241 (11.5)          | 1239 (12.2)          | 2480 (11.9)          |
| South Central                            | 897 (10.5)           | 436 (10.2)           | 1333 (10.4)          | 62 (12.9)                | 177 (10.2)           | 239 (10.8)           | 90 (8.8)             | 72 (9.8)             | 162 (9.2)            | 224 (10.5)           | 111 (11.4)           | 335 (10.8)           | 1112 (10.3)          | 1040 (10.2)          | 2152 (10.3)          |
| London                                   | 979 (11.4)           | 411 (9.6)            | 1390 (10.8)          | 48 (10.0)                | 175 (10.1)           | 223 (10.1)           | 283 (27.8)           | 202 (27.5)           | 485 (27.7)           | 337 (15.8)           | 149 (15.3)           | 486 (15.6)           | 1762 (16.4)          | 1599 (15.7)          | 3361 (16.1)          |
| South East Coast                         | 872 (10.2)           | 459 (10.7)           | 1331 (10.4)          | 68 (14.1)                | 222 (12.8)           | 290 (13.1)           | 89 (8.7)             | 67 (9.1)             | 156 (8.9)            | 168 (7.9)            | 77 (7.9)             | 245 (7.9)            | 1403 (13.0)          | 1374 (13.5)          | 2777 (13.3)          |
| Age (years, median [IQR])                | 54.92 [46.71, 63.26] | 54.52 [46.54, 62.95] | 54.83 [46.63, 63.14] | 62.47 [50.49, 71.72]     | 63.49 [53.41, 72.93] | 63.29 [53.06, 72.59] | 49.60 [41.05, 58.63] | 43.14 [36.45, 54.33] | 47.10 [38.32, 57.00] | 46.75 [39.70, 54.75] | 46.09 [38.51, 55.92] | 46.50 [39.29, 54.96] | 55.80 [46.58, 65.67] | 57.76 [48.92, 67.55] | 56.79 [47.77, 66.56] |
| Age categories (%)                       |                      |                      |                      |                          |                      |                      |                      |                      |                      |                      |                      |                      |                      |                      |                      |
| 30 - 39                                  | 886 (10.4)           | 418 (9.8)            | 1304 (10.2)          | 36 (7.5)                 | 107 (6.2)            | 143 (6.5)            | 231 (22.7)           | 288 (39.2)           | 519 (29.6)           | 560 (26.2)           | 294 (30.1)           | 854 (27.4)           | 1196 (11.1)          | 912 (9.0)            | 2108 (10.1)          |
| 40 - 49                                  | 2053 (24.0)          | 1093 (25.5)          | 3146 (24.5)          | 76 (15.8)                | 211 (12.2)           | 287 (13.0)           | 293 (28.8)           | 200 (27.2)           | 493 (28.1)           | 727 (34.1)           | 302 (30.9)           | 1029 (33.1)          | 2415 (22.5)          | 1869 (18.4)          | 4284 (20.5)          |
| 50 - 59                                  | 2674 (31.2)          | 1344 (31.4)          | 4018 (31.3)          | 101 (21.0)               | 385 (22.3)           | 486 (22.0)           | 276 (27.1)           | 135 (18.4)           | 411 (23.4)           | 567 (26.6)           | 199 (20.4)           | 766 (24.6)           | 2984 (27.8)          | 2979 (29.3)          | 5963 (28.5)          |
| 60 - 69                                  | 2068 (24.2)          | 963 (22.5)           | 3031 (23.6)          | 125 (25.9)               | 473 (27.4)           | 598 (27.1)           | 138 (13.5)           | 66 (9.0)             | 204 (11.6)           | 199 (9.3)            | 117 (12.0)           | 316 (10.2)           | 2467 (22.9)          | 2396 (23.5)          | 4863 (23.2)          |
| 70 - 79                                  | 727 (8.5)            | 385 (9.0)            | 1112 (8.7)           | 108 (22.4)               | 395 (22.9)           | 503 (22.8)           | 57 (5.6)             | 31 (4.2)             | 88 (5.0)             | 64 (3.0)             | 46 (4.7)             | 110 (3.5)            | 1316 (12.2)          | 1461 (14.4)          | 2777 (13.3)          |
| 80 & above                               | 152 (1.8)            | 82 (1.9)             | 234 (1.8)            | 36 (7.5)                 | 157 (9.1)            | 193 (8.7)            | 24 (2.4)             | 14 (1.9)             | 38 (2.2)             | 18 (0.8)             | 19 (1.9)             | 37 (1.2)             | 373 (3.5)            | 560 (5.5)            | 933 (4.5)            |
| BMI ≥ 30 kg/m2 (%)                       | 1840 (21.5)          | 763 (17.8)           | 2603 (20.3)          | 82 (17.0)                | 417 (24.1)           | 499 (22.6)           | 164 (16.1)           | 141 (19.2)           | 305 (17.4)           | 248 (11.6)           | 170 (17.4)           | 418 (13.4)           | 4385 (40.8)          | 5367 (52.7)          | 9752 (46.6)          |
| Smoking (%)                              |                      |                      |                      |                          |                      |                      |                      |                      |                      |                      |                      |                      |                      |                      |                      |
| Non smoker                               | 1653 (19.3)          | 986 (23.0)           | 2639 (20.5)          | 195 (40.5)               | 732 (42.4)           | 927 (41.9)           | 323 (31.7)           | 362 (49.3)           | 685 (39.1)           | 222 (10.4)           | 226 (23.1)           | 448 (14.4)           | 4002 (37.2)          | 4874 (47.9)          | 8876 (42.4)          |
| Current smoker                           | 4487 (52.4)          | 2316 (54.0)          | 6803 (53.0)          | 95 (19.7)                | 405 (23.4)           | 500 (22.6)           | 353 (34.6)           | 152 (20.7)           | 505 (28.8)           | 1453 (68.1)          | 539 (55.2)           | 1992 (64.0)          | 3175 (29.5)          | 2456 (24.1)          | 5631 (26.9)          |
| Ex or current smoker                     | 9 (0.1)              | 5 (0.1)              | 14 (0.1)             | 2 (0.4)                  | 2 (0.1)              | 4 (0.2)              | 0 (0.0)              | 1 (0.1)              | 1 (0.1)              | 2 (0.1)              | 0 (0.0)              | 2 (0.1)              | 9 (0.1)              | 8 (0.1)              | 17 (0.1)             |
| Ex smoker                                | 1973 (23.0)          | 810 (18.9)           | 2783 (21.7)          | 174 (36.1)               | 526 (30.4)           | 700 (31.7)           | 260 (25.5)           | 176 (24.0)           | 436 (24.9)           | 319 (14.9)           | 162 (16.6)           | 481 (15.5)           | 3434 (31.9)          | 2763 (27.1)          | 6197 (29.6)          |
| No smoking information                   | 438 (5.1)            | 168 (3.9)            | 606 (4.7)            | 16 (3.3)                 | 63 (3.6)             | 79 (3.6)             | 83 (8.1)             | 43 (5.9)             | 126 (7.2)            | 139 (6.5)            | 50 (5.1)             | 189 (6.1)            | 131 (1.2)            | 76 (0.7)             | 207 (1.0)            |
| Comorbidities                            |                      |                      |                      |                          |                      |                      |                      |                      |                      |                      |                      |                      |                      |                      |                      |
| Barrett's oesophagus (%)                 | 104 (1.2)            | 30 (0.7)             | 134 (1.0)            | 8 (1.7)                  | 12 (0.7)             | 20 (0.9)             | 5 (0.5)              | 1 (0.1)              | 6 (0.3)              | 13 (0.6)             | 3 (0.3)              | 16 (0.5)             | 176 (1.6)            | 98 (1.0)             | 274 (1.3)            |
| Crohn's disease (%)                      | 29 (0.3)             | 25 (0.6)             | 54 (0.4)             | 23 (4.8)                 | 25 (1.4)             | 48 (2.2)             | 5 (0.5)              | 6 (0.8)              | 11 (0.6)             | 7 (0.3)              | 3 (0.3)              | 10 (0.3)             | 107 (1.0)            | 120 (1.2)            | 227 (1.1)            |
| Diabetes mellitus (%)                    | 1149 (13.4)          | 427 (10.0)           | 1576 (12.3)          | 82 (17.0)                | 226 (13.1)           | 308 (13.9)           | 127 (12.5)           | 66 (9.0)             | 193 (11.0)           | 183 (8.6)            | 79 (8.1)             | 262 (8.4)            | 2469 (23.0)          | 2553 (25.1)          | 5022 (24.0)          |
| Complications of diabetes (%)            | 270 (3.2)            | 82 (1.9)             | 352 (2.7)            | 29 (6.0)                 | 62 (3.6)             | 91 (4.1)             | 23 (2.3)             | 10 (1.4)             | 33 (1.9)             | 49 (2.3)             | 23 (2.4)             | 72 (2.3)             | 691 (6.4)            | 652 (6.4)            | 1343 (6.4)           |
| Diverticular disease of intestine (%)    | 278 (3.2)            | 152 (3.5)            | 430 (3.3)            | 23 (4.8)                 | 123 (7.1)            | 146 (6.6)            | 18 (1.8)             | 14 (1.9)             | 32 (1.8)             | 17 (0.8)             | 21 (2.1)             | 38 (1.2)             | 591 (5.5)            | 848 (8.3)            | 1439 (6.9)           |
| Dyslipidaemia (%)                        | 940 (11.0)           | 390 (9.1)            | 1330 (10.4)          | 54 (11.2)                | 218 (12.6)           | 272 (12.3)           | 76 (7.5)             | 37 (5.0)             | 113 (6.4)            | 71 (3.3)             | 36 (3.7)             | 107 (3.4)            | 1972 (18.3)          | 1875 (18.4)          | 3847 (18.4)          |
| Gastro-oesophageal reflux disease (%)    | 871 (10.2)           | 446 (10.4)           | 1317 (10.3)          | 56 (11.6)                | 221 (12.8)           | 277 (12.5)           | 77 (7.6)             | 52 (7.1)             | 129 (7.4)            | 162 (7.6)            | 81 (8.3)             | 243 (7.8)            | 1650 (15.3)          | 2088 (20.5)          | 3738 (17.9)          |
| Hypertension (%)                         | 2423 (28.3)          | 1095 (25.6)          | 3518 (27.4)          | 128 (26.6)               | 536 (31.0)           | 664 (30.0)           | 168 (16.5)           | 101 (13.8)           | 269 (15.3)           | 231 (10.8)           | 120 (12.3)           | 351 (11.3)           | 3704 (34.5)          | 3629 (35.7)          | 7333 (35.0)          |
| Irritable bowel syndrome (%)             | 289 (3.4)            | 408 (9.5)            | 697 (5.4)            | 27 (5.6)                 | 201 (11.6)           | 228 (10.3)           | 45 (4.4)             | 40 (5.4)             | 85 (4.8)             | 59 (2.8)             | 83 (8.5)             | 142 (4.6)            | 745 (6.9)            | 1775 (17.4)          | 2520 (12.0)          |
| Jaundice (%)                             | 627 (7.3)            | 434 (10.1)           | 1061 (8.3)           | 80 (16.6)                | 176 (10.2)           | 256 (11.6)           | 72 (7.1)             | 28 (3.8)             | 100 (5.7)            | 77 (3.6)             | 38 (3.9)             | 115 (3.7)            | 257 (2.4)            | 213 (2.1)            | 470 (2.2)            |
| Proteinuric kidney diseases (%)          | 60 (0.7)             | 18 (0.4)             | 78 (0.6)             | 10 (2.1)                 | 15 (0.9)             | 25 (1.1)             | 16 (1.6)             | 10 (1.4)             | 26 (1.5)             | 30 (1.4)             | 10 (1.0)             | 40 (1.3)             | 133 (1.2)            | 117 (1.1)            | 250 (1.2)            |
| Oesophagitis and oesophageal ulcer (%)   | 755 (8.8)            | 340 (7.9)            | 1095 (8.5)           | 45 (9.3)                 | 148 (8.6)            | 193 (8.7)            | 57 (5.6)             | 24 (3.3)             | 81 (4.6)             | 122 (5.7)            | 44 (4.5)             | 166 (5.3)            | 1103 (10.3)          | 1233 (12.1)          | 2336 (11.2)          |
| Proteinuria (%)                          | 2927 (34.2)          | 1553 (36.2)          | 4480 (34.9)          | 213 (44.2)               | 861 (49.8)           | 1074 (48.6)          | 375 (36.8)           | 296 (40.3)           | 671 (38.3)           | 597 (28.0)           | 383 (39.2)           | 980 (31.5)           | 5300 (49.3)          | 6075 (59.7)          | 11375 (54.4)         |
| Renal disease (%)                        | 339 (4.0)            | 218 (5.1)            | 557 (4.3)            | 46 (9.5)                 | 194 (11.2)           | 240 (10.9)           | 72 (7.1)             | 45 (6.1)             | 117 (6.7)            | 87 (4.1)             | 62 (6.3)             | 149 (4.8)            | 872 (8.1)            | 1377 (13.5)          | 2249 (10.7)          |
| Biomarkers                               |                      |                      |                      |                          |                      |                      |                      |                      |                      |                      |                      |                      |                      |                      |                      |
| Albumin < 35 g/L (%)                     | 1378 (16.1)          | 882 (20.6)           | 2260 (17.6)          | 75 (15.6)                | 217 (12.6)           | 292 (13.2)           | 62 (6.1)             | 37 (5.0)             | 99 (5.6)             | 142 (6.7)            | 73 (7.5)             | 215 (6.9)            | 438 (4.1)            | 516 (5.1)            | 954 (4.6)            |
| Alanine aminotransferase ≥ 35 U/L (%)    | 1527 (17.8)          | 650 (15.2)           | 2177 (16.9)          | 119 (24.7)               | 395 (22.9)           | 514 (23.3)           | 118 (11.6)           | 44 (6.0)             | 162 (9.2)            | 315 (14.8)           | 129 (13.2)           | 444 (14.3)           | 1605 (14.9)          | 920 (9.0)            | 2525 (12.1)          |
| Aspartate transaminase ≥ 40 U/L (%)      | 570 (6.7)            | 298 (7.0)            | 868 (6.8)            | 39 (8.1)                 | 138 (8.0)            | 177 (8.0)            | 41 (4.0)             | 17 (2.3)             | 58 (3.3)             | 85 (4.0)             | 44 (4.5)             | 129 (4.1)            | 327 (3.0)            | 233 (2.3)            | 560 (2.7)            |
| Bilirubin ≥ 34.2 μmol/L (%)              | 1043 (12.2)          | 657 (15.3)           | 1700 (13.2)          | 65 (13.5)                | 141 (8.2)            | 206 (9.3)            | 66 (6.5)             | 17 (2.3)             | 83 (4.7)             | 77 (3.6)             | 26 (2.7)             | 103 (3.3)            | 306 (2.8)            | 183 (1.8)            | 489 (2.3)            |
| C reactive protein ≥ 10 mg/L (%)         | 475 (5.5)            | 301 (7.0)            | 776 (6.0)            | 48 (10.0)                | 160 (9.3)            | 208 (9.4)            | 41 (4.0)             | 15 (2.0)             | 56 (3.2)             | 47 (2.2)             | 27 (2.8)             | 74 (2.4)             | 483 (4.5)            | 696 (6.8)            | 1179 (5.6)           |
| Gamma- glutamyltransferase ≥ 48 U/L (%)  | 1777 (20.8)          | 852 (19.9)           | 2629 (20.5)          | 110 (22.8)               | 392 (22.7)           | 502 (22.7)           | 64 (6.3)             | 24 (3.3)             | 88 (5.0)             | 186 (8.7)            | 75 (7.7)             | 261 (8.4)            | 1157 (10.8)          | 765 (7.5)            | 1922 (9.2)           |
| International Normalized Ratio ≥ 1.7 (%) | 59 (0.7)             | 21 (0.5)             | 80 (0.6)             | 8 (1.7)                  | 10 (0.6)             | 18 (0.8)             | 4 (0.4)              | 2 (0.3)              | 6 (0.3)              | 9 (0.4)              | 6 (0.6)              | 15 (0.5)             | 94 (0.9)             | 68 (0.7)             | 162 (0.8)            |
| Platelet ≤ 150 10^9/L (%)                | 1460 (17.1)          | 599 (14.0)           | 2059 (16.0)          | 55 (11.4)                | 145 (8.4)            | 200 (9.0)            | 89 (8.7)             | 28 (3.8)             | 117 (6.7)            | 222 (10.4)           | 75 (7.7)             | 297 (9.5)            | 618 (5.7)            | 305 (3.0)            | 923 (4.4)            |
| Triglycerides ≥ 2 mmol/L (%)             | 578 (6.8)            | 200 (4.7)            | 778 (6.1)            | 25 (5.2)                 | 67 (3.9)             | 92 (4.2)             | 31 (3.0)             | 11 (1.5)             | 42 (2.4)             | 50 (2.3)             | 15 (1.5)             | 65 (2.1)             | 1483 (13.8)          | 1075 (10.6)          | 2558 (12.2)          |
