# Supplementary material for: Increased burden of cardiovascular disease in people with liver disease: unequal geographical variations, risk factors and excess years of life lost
Source: Springer Nature journal article supplement (doi:10.1186/s12967-021-03210-9), 2022-01-03
Supplement: MOESM5 [file 19991640]

**Additional file 5. Age-standardised incidence rates for liver disease.**

| Liver disease type       | Practice region        | Incidence rate (per 100,000 person years) | Lower CI | Upper CI |
|--------------------------|------------------------|-------------------------------------------|----------|----------|
| ALD                      | North East             | 32.43                                     | 24.82    | 40.05    |
| ALD                      | North West             | 34.68                                     | 31.75    | 37.61    |
| ALD                      | Yorkshire & The Humber | 20.78                                     | 16.54    | 25.03    |
| ALD                      | East Midlands          | 25.95                                     | 20.75    | 31.16    |
| ALD                      | West Midlands          | 26.67                                     | 23.72    | 29.61    |
| ALD                      | East of England        | 18.28                                     | 15.83    | 20.74    |
| ALD                      | South West             | 24.20                                     | 21.57    | 26.84    |
| ALD                      | South Central          | 22.94                                     | 20.38    | 25.49    |
| ALD                      | London                 | 23.61                                     | 21.06    | 26.16    |
| ALD                      | South East Coast       | 22.26                                     | 19.86    | 24.65    |
| ALD                      | England                | 24.71                                     | 23.76    | 25.66    |
| Any liver disease        | North East             | 146.04                                    | 129.89   | 162.18   |
| Any liver disease        | North West             | 150.85                                    | 144.75   | 156.96   |
| Any liver disease        | Yorkshire & The Humber | 86.53                                     | 77.86    | 95.19    |
| Any liver disease        | East Midlands          | 87.59                                     | 78.03    | 97.15    |
| Any liver disease        | West Midlands          | 102.03                                    | 96.28    | 107.79   |
| Any liver disease        | East of England        | 94.61                                     | 89.02    | 100.19   |
| Any liver disease        | South West             | 105.21                                    | 99.72    | 110.71   |
| Any liver disease        | South Central          | 94.10                                     | 88.93    | 99.27    |
| Any liver disease        | London                 | 148.58                                    | 142.19   | 154.96   |
| Any liver disease        | South East Coast       | 113.42                                    | 108.01   | 118.82   |
| Any liver disease        | England                | 114.52                                    | 112.47   | 116.56   |
| Autoimmune liver disease | North East             | 5.87                                      | 2.63     | 9.11     |
| Autoimmune liver disease | North West             | 4.61                                      | 3.54     | 5.68     |
| Autoimmune liver disease | Yorkshire & The Humber | 2.86                                      | 1.29     | 4.44     |
| Autoimmune liver disease | East Midlands          | 2.90                                      | 1.16     | 4.64     |
| Autoimmune liver disease | West Midlands          | 3.48                                      | 2.42     | 4.55     |
| Autoimmune liver disease | East of England        | 3.20                                      | 2.17     | 4.23     |
| Autoimmune liver disease | South West             | 4.06                                      | 2.98     | 5.14     |
| Autoimmune liver disease | South Central          | 3.51                                      | 2.51     | 4.51     |
| Autoimmune liver disease | London                 | 3.44                                      | 2.47     | 4.41     |
| Autoimmune liver disease | South East Coast       | 3.68                                      | 2.71     | 4.66     |
| Autoimmune liver disease | England                | 3.71                                      | 3.34     | 4.08     |
| HBV                      | North East             | 3.07                                      | 0.73     | 5.41     |
| HBV                      | North West             | 2.99                                      | 2.13     | 3.86     |
| HBV                      | Yorkshire & The Humber | 0.78                                      | 0.00     | 1.60     |
| HBV                      | East Midlands          | 3.14                                      | 1.33     | 4.95     |
| HBV                      | West Midlands          | 3.59                                      | 2.51     | 4.67     |
| HBV                      | East of England        | 3.27                                      | 2.23     | 4.31     |
| HBV                      | South West             | 2.78                                      | 1.88     | 3.67     |
| HBV                      | South Central          | 2.47                                      | 1.63     | 3.31     |
| HBV                      | London                 | 11.40                                     | 9.63     | 13.17    |
| HBV                      | South East Coast       | 3.29                                      | 2.37     | 4.21     |
| HBV                      | England                | 4.09                                      | 3.70     | 4.47     |
| HCV                      | North East             | 9.71                                      | 5.54     | 13.88    |
| HCV                      | North West             | 8.96                                      | 7.47     | 10.44    |
| HCV                      | Yorkshire & The Humber | 5.83                                      | 3.58     | 8.08     |
| HCV                      | East Midlands          | 6.16                                      | 3.62     | 8.69     |
| HCV                      | West Midlands          | 5.29                                      | 3.98     | 6.60     |
| HCV                      | East of England        | 4.25                                      | 3.06     | 5.43     |
| HCV                      | South West             | 8.15                                      | 6.62     | 9.68     |
| HCV                      | South Central          | 4.80                                      | 3.63     | 5.97     |
| HCV                      | London                 | 5.84                                      | 4.57     | 7.10     |
| HCV                      | South East Coast       | 4.73                                      | 3.63     | 5.84     |
| HCV                      | England                | 5.98                                      | 5.51     | 6.44     |
| NAFLD                    | North East             | 107.62                                    | 93.76    | 121.48   |
| NAFLD                    | North West             | 112.16                                    | 106.89   | 117.42   |
| NAFLD                    | Yorkshire & The Humber | 61.09                                     | 53.81    | 68.37    |
| NAFLD                    | East Midlands          | 59.09                                     | 51.24    | 66.94    |
| NAFLD                    | West Midlands          | 71.43                                     | 66.62    | 76.25    |
| NAFLD                    | East of England        | 72.06                                     | 67.18    | 76.93    |
| NAFLD                    | South West             | 76.62                                     | 71.93    | 81.31    |
| NAFLD                    | South Central          | 68.50                                     | 64.08    | 72.91    |
| NAFLD                    | London                 | 116.39                                    | 110.74   | 122.04   |
| NAFLD                    | South East Coast       | 88.53                                     | 83.75    | 93.30    |
| NAFLD                    | England                | 85.48                                     | 83.72    | 87.25    |
