# Supplementary material for: Increased burden of cardiovascular disease in people with liver disease: unequal geographical variations, risk factors and excess years of life lost
Source: Springer Nature journal article supplement (doi:10.1186/s12967-021-03210-9), 2022-01-03
Supplement: MOESM6 [file 19991640]

Additional file 6. Age-specific incidence rates for liver disease.

| Liver disease type       | Practice region        | Age group    | Incidence rate (per 100,000 person years) | Lower CI | Upper CI |
|--------------------------|------------------------|--------------|-------------------------------------------|----------|----------|
| ALD                      | North East             | 30-39        | 5.05                                      | 0.00     | 12.86    |
| ALD                      | North West             | 30-39        | 1.57                                      | 1.20     | 5.93     |
| ALD                      | Yorkshire & The Humber | 30-39        | 2.65                                      | 0.00     | 7.68     |
| ALD                      | East Midlands          | 30-39        | 5.09                                      | 0.00     | 13.32    |
| ALD                      | West Midlands          | 30-39        | 3.00                                      | 0.43     | 5.57     |
| ALD                      | East of England        | 30-39        | 1.88                                      | 0.00     | 4.03     |
| ALD                      | South West             | 30-39        | 3.15                                      | 0.55     | 5.74     |
| ALD                      | South Central          | 30-39        | 2.18                                      | 0.15     | 4.22     |
| ALD                      | London                 | 30-39        | 1.34                                      | 0.03     | 2.66     |
| ALD                      | South East Coast       | 30-39        | 2.01                                      | 0.19     | 3.82     |
| ALD                      | England                | 30-39        | 2.50                                      | 1.72     | 3.28     |
| ALD                      | North East             | 40-49        | 6.58                                      | 0.00     | 14.30    |
| ALD                      | North West             | 40-49        | 7.40                                      | 4.43     | 10.38    |
| ALD                      | Yorkshire & The Humber | 40-49        | 4.66                                      | 0.19     | 9.12     |
| ALD                      | East Midlands          | 40-49        | 4.10                                      | 0.00     | 8.45     |
| ALD                      | West Midlands          | 40-49        | 4.76                                      | 2.01     | 7.50     |
| ALD                      | East of England        | 40-49        | 3.30                                      | 1.08     | 5.51     |
| ALD                      | South West             | 40-49        | 4.95                                      | 2.24     | 7.66     |
| ALD                      | South Central          | 40-49        | 3.82                                      | 1.40     | 5.83     |
| ALD                      | London                 | 40-49        | 3.33                                      | 1.43     | 5.24     |
| ALD                      | South East Coast       | 40-49        | 4.45                                      | 2.08     | 6.82     |
| ALD                      | England                | 40-49        | 4.59                                      | 3.70     | 5.47     |
| ALD                      | North East             | 50-59        | 7.24                                      | 0.00     | 14.83    |
| ALD                      | North West             | 50-59        | 9.35                                      | 6.14     | 12.57    |
| ALD                      | Yorkshire & The Humber | 50-59        | 5.36                                      | 0.94     | 9.78     |
| ALD                      | East Midlands          | 50-59        | 7.61                                      | 1.97     | 13.24    |
| ALD                      | West Midlands          | 50-59        | 7.41                                      | 4.07     | 10.76    |
| ALD                      | East of England        | 50-59        | 5.57                                      | 2.72     | 8.42     |
| ALD                      | South West             | 50-59        | 7.16                                      | 4.10     | 10.22    |
| ALD                      | South Central          | 50-59        | 7.03                                      | 4.02     | 10.03    |
| ALD                      | London                 | 50-59        | 7.11                                      | 4.12     | 10.11    |
| ALD                      | South East Coast       | 50-59        | 6.05                                      | 3.38     | 8.73     |
| ALD                      | England                | 50-59        | 7.09                                      | 6.01     | 8.18     |
| ALD                      | North East             | 60-69        | 10.06                                     | 0.32     | 19.81    |
| ALD                      | North West             | 60-69        | 9.11                                      | 5.57     | 12.65    |
| ALD                      | Yorkshire & The Humber | 60-69        | 5.47                                      | 0.69     | 10.24    |
| ALD                      | East Midlands          | 60-69        | 5.90                                      | 0.26     | 11.54    |
| ALD                      | West Midlands          | 60-69        | 7.86                                      | 4.09     | 11.63    |
| ALD                      | East of England        | 60-69        | 4.55                                      | 1.65     | 7.45     |
| ALD                      | South West             | 60-69        | 5.26                                      | 2.41     | 8.11     |
| ALD                      | South Central          | 60-69        | 5.41                                      | 2.48     | 8.34     |
| ALD                      | London                 | 60-69        | 7.22                                      | 3.53     | 10.92    |
| ALD                      | South East Coast       | 60-69        | 6.21                                      | 3.19     | 9.23     |
| ALD                      | England                | 60-69        | 6.56                                      | 5.40     | 7.73     |
| ALD                      | North East             | 70-79        | 2.81                                      | 0.00     | 8.61     |
| ALD                      | North West             | 70-79        | 4.62                                      | 1.75     | 7.48     |
| ALD                      | Yorkshire & The Humber | 70-79        | 2.11                                      | 0.00     | 5.58     |
| ALD                      | East Midlands          | 70-79        | 2.45                                      | 0.00     | 6.60     |
| ALD                      | West Midlands          | 70-79        | 3.00                                      | 0.42     | 5.57     |
| ALD                      | East of England        | 70-79        | 2.44                                      | 0.01     | 4.88     |
| ALD                      | South West             | 70-79        | 2.86                                      | 0.55     | 5.18     |
| ALD                      | South Central          | 70-79        | 3.72                                      | 0.97     | 6.46     |
| ALD                      | London                 | 70-79        | 3.41                                      | 0.30     | 6.52     |
| ALD                      | South East Coast       | 70-79        | 3.08                                      | 0.70     | 5.45     |
| ALD                      | England                | 70-79        | 3.24                                      | 2.31     | 4.17     |
| ALD                      | North East             | 80 and above | NA                                        | NA       | NA       |
| ALD                      | North West             | 80 and above | 0.63                                      | 0.00     | 1.94     |
| ALD                      | Yorkshire & The Humber | 80 and above | 0.53                                      | 0.00     | 2.61     |
| ALD                      | East Midlands          | 80 and above | 0.79                                      | 0.00     | 3.63     |
| ALD                      | West Midlands          | 80 and above | 0.64                                      | 0.00     | 2.05     |
| ALD                      | East of England        | 80 and above | 0.54                                      | 0.00     | 1.86     |
| ALD                      | South West             | 80 and above | 0.83                                      | 0.00     | 2.27     |
| ALD                      | South Central          | 80 and above | 0.98                                      | 0.00     | 2.66     |
| ALD                      | London                 | 80 and above | 1.19                                      | 0.00     | 3.31     |
| ALD                      | South East Coast       | 80 and above | 0.46                                      | 0.00     | 1.52     |
| ALD                      | England                | 80 and above | 0.73                                      | 0.21     | 1.25     |
| Any liver disease        | North East             | 30-39        | 20.21                                     | 4.59     | 35.82    |
| Any liver disease        | North West             | 30-39        | 17.99                                     | 12.67    | 23.31    |
| Any liver disease        | Yorkshire & The Humber | 30-39        | 13.60                                     | 2.23     | 24.98    |
| Any liver disease        | East Midlands          | 30-39        | 10.66                                     | 0.00     | 22.56    |
| Any liver disease        | West Midlands          | 30-39        | 13.08                                     | 7.71     | 18.45    |
| Any liver disease        | East of England        | 30-39        | 10.44                                     | 5.38     | 15.50    |
| Any liver disease        | South West             | 30-39        | 14.98                                     | 9.31     | 20.65    |
| Any liver disease        | South Central          | 30-39        | 11.65                                     | 6.95     | 16.35    |
| Any liver disease        | London                 | 30-39        | 14.64                                     | 10.30    | 18.97    |
| Any liver disease        | South East Coast       | 30-39        | 11.92                                     | 7.50     | 16.35    |
| Any liver disease        | England                | 30-39        | 13.84                                     | 12.01    | 15.67    |
| Any liver disease        | North East             | 40-49        | 24.53                                     | 9.61     | 39.44    |
| Any liver disease        | North West             | 40-49        | 26.43                                     | 20.81    | 32.05    |
| Any liver disease        | Yorkshire & The Humber | 40-49        | 12.84                                     | 5.43     | 20.26    |
| Any liver disease        | East Midlands          | 40-49        | 15.50                                     | 7.05     | 23.96    |
| Any liver disease        | West Midlands          | 40-49        | 17.56                                     | 12.28    | 22.83    |
| Any liver disease        | East of England        | 40-49        | 15.49                                     | 10.69    | 20.30    |
| Any liver disease        | South West             | 40-49        | 18.62                                     | 13.36    | 23.88    |
| Any liver disease        | South Central          | 40-49        | 14.86                                     | 10.38    | 19.35    |
| Any liver disease        | London                 | 40-49        | 20.65                                     | 15.91    | 25.38    |
| Any liver disease        | South East Coast       | 40-49        | 19.43                                     | 14.48    | 24.38    |
| Any liver disease        | England                | 40-49        | 18.99                                     | 17.18    | 20.79    |
| Any liver disease        | North East             | 50-59        | 37.06                                     | 19.90    | 54.22    |
| Any liver disease        | North West             | 50-59        | 41.28                                     | 34.52    | 48.04    |
| Any liver disease        | Yorkshire & The Humber | 50-59        | 21.20                                     | 12.41    | 29.99    |
| Any liver disease        | East Midlands          | 50-59        | 23.12                                     | 13.30    | 32.95    |
| Any liver disease        | West Midlands          | 50-59        | 24.67                                     | 18.57    | 30.78    |
| Any liver disease        | East of England        | 50-59        | 24.79                                     | 18.78    | 30.80    |
| Any liver disease        | South West             | 50-59        | 27.26                                     | 21.29    | 33.23    |
| Any liver disease        | South Central          | 50-59        | 23.61                                     | 18.10    | 29.12    |
| Any liver disease        | London                 | 50-59        | 38.13                                     | 31.20    | 45.06    |
| Any liver disease        | South East Coast       | 50-59        | 29.15                                     | 23.28    | 35.03    |
| Any liver disease        | England                | 50-59        | 29.77                                     | 27.55    | 31.98    |
| Any liver disease        | North East             | 60-69        | 32.26                                     | 14.81    | 49.72    |
| Any liver disease        | North West             | 60-69        | 36.52                                     | 29.42    | 43.61    |
| Any liver disease        | Yorkshire & The Humber | 60-69        | 21.08                                     | 11.70    | 30.45    |
| Any liver disease        | East Midlands          | 60-69        | 19.63                                     | 9.33     | 29.92    |
| Any liver disease        | West Midlands          | 60-69        | 25.87                                     | 19.03    | 32.71    |
| Any liver disease        | East of England        | 60-69        | 22.20                                     | 15.79    | 28.61    |
| Any liver disease        | South West             | 60-69        | 22.05                                     | 16.23    | 27.88    |
| Any liver disease        | South Central          | 60-69        | 21.70                                     | 15.84    | 27.56    |
| Any liver disease        | London                 | 60-69        | 37.37                                     | 28.97    | 45.77    |
| Any liver disease        | South East Coast       | 60-69        | 27.62                                     | 21.25    | 33.98    |
| Any liver disease        | England                | 60-69        | 27.17                                     | 24.80    | 29.54    |
| Any liver disease        | North East             | 70-79        | 22.73                                     | 5.64     | 39.82    |
| Any liver disease        | North West             | 70-79        | 21.85                                     | 15.62    | 28.08    |
| Any liver disease        | Yorkshire & The Humber | 70-79        | 12.92                                     | 4.35     | 21.49    |
| Any liver disease        | East Midlands          | 70-79        | 12.72                                     | 3.27     | 22.17    |
| Any liver disease        | West Midlands          | 70-79        | 15.22                                     | 9.42     | 21.02    |
| Any liver disease        | East of England        | 70-79        | 16.26                                     | 9.97     | 22.54    |
| Any liver disease        | South West             | 70-79        | 16.87                                     | 11.24    | 22.49    |
| Any liver disease        | South Central          | 70-79        | 15.98                                     | 10.29    | 21.67    |
| Any liver disease        | London                 | 70-79        | 26.83                                     | 18.10    | 35.56    |
| Any liver disease        | South East Coast       | 70-79        | 18.84                                     | 12.96    | 24.71    |
| Any liver disease        | England                | 70-79        | 18.23                                     | 16.03    | 20.44    |
| Any liver disease        | North East             | 80 and above | 9.26                                      | 0.00     | 22.03    |
| Any liver disease        | North West             | 80 and above | 6.79                                      | 2.52     | 11.05    |
| Any liver disease        | Yorkshire & The Humber | 80 and above | 4.89                                      | 0.00     | 11.18    |
| Any liver disease        | East Midlands          | 80 and above | 5.96                                      | 0.00     | 13.71    |
| Any liver disease        | West Midlands          | 80 and above | 5.63                                      | 1.48     | 9.79     |
| Any liver disease        | East of England        | 80 and above | 5.43                                      | 1.27     | 9.58     |
| Any liver disease        | South West             | 80 and above | 5.43                                      | 1.73     | 9.14     |
| Any liver disease        | South Central          | 80 and above | 6.30                                      | 2.04     | 10.55    |
| Any liver disease        | London                 | 80 and above | 10.96                                     | 4.52     | 17.39    |
| Any liver disease        | South East Coast       | 80 and above | 6.46                                      | 2.45     | 10.46    |
| Any liver disease        | England                | 80 and above | 6.52                                      | 4.97     | 8.07     |
| Autoimmune liver disease | North East             | 30-39        | NA                                        | NA       | NA       |
| Autoimmune liver disease | North West             | 30-39        | 0.38                                      | 0.00     | 1.16     |
| Autoimmune liver disease | Yorkshire & The Humber | 30-39        | NA                                        | NA       | NA       |
| Autoimmune liver disease | East Midlands          | 30-39        | NA                                        | NA       | NA       |
| Autoimmune liver disease | West Midlands          | 30-39        | NA                                        | NA       | NA       |
| Autoimmune liver disease | East of England        | 30-39        | NA                                        | NA       | NA       |
| Autoimmune liver disease | South West             | 30-39        | 0.37                                      | 0.00     | 1.27     |
| Autoimmune liver disease | South Central          | 30-39        | 0.46                                      | 0.00     | 1.40     |
| Autoimmune liver disease | London                 | 30-39        | NA                                        | NA       | NA       |
| Autoimmune liver disease | South East Coast       | 30-39        | 0.34                                      | 0.00     | 1.10     |
| Autoimmune liver disease | England                | 30-39        | 0.30                                      | 0.03     | 0.57     |
| Autoimmune liver disease | North East             | 40-49        | NA                                        | NA       | NA       |
| Autoimmune liver disease | North West             | 40-49        | 0.39                                      | 0.00     | 1.08     |
| Autoimmune liver disease | Yorkshire & The Humber | 40-49        | NA                                        | NA       | NA       |
| Autoimmune liver disease | East Midlands          | 40-49        | NA                                        | NA       | NA       |
| Autoimmune liver disease | West Midlands          | 40-49        | 0.42                                      | 0.00     | 1.23     |
| Autoimmune liver disease | East of England        | 40-49        | NA                                        | NA       | NA       |
| Autoimmune liver disease | South West             | 40-49        | 0.44                                      | 0.00     | 1.25     |
| Autoimmune liver disease | South Central          | 40-49        | 0.45                                      | 0.00     | 1.22     |
| Autoimmune liver disease | London                 | 40-49        | 0.54                                      | 0.00     | 1.30     |
| Autoimmune liver disease | South East Coast       | 40-49        | NA                                        | NA       | NA       |
| Autoimmune liver disease | England                | 40-49        | 0.35                                      | 0.11     | 0.60     |
| Autoimmune liver disease | North East             | 50-59        | NA                                        | NA       | NA       |
| Autoimmune liver disease | North West             | 50-59        | 1.01                                      | 0.00     | 2.07     |
| Autoimmune liver disease | Yorkshire & The Humber | 50-59        | 0.89                                      | 0.00     | 2.70     |
| Autoimmune liver disease | East Midlands          | 50-59        | 0.88                                      | 0.00     | 2.79     |
| Autoimmune liver disease | West Midlands          | 50-59        | 0.69                                      | 0.00     | 1.71     |
| Autoimmune liver disease | East of England        | 50-59        | 0.61                                      | 0.00     | 1.60     |
| Autoimmune liver disease | South West             | 50-59        | 0.73                                      | 0.00     | 1.71     |
| Autoimmune liver disease | South Central          | 50-59        | 0.45                                      | 0.00     | 1.21     |
| Autoimmune liver disease | London                 | 50-59        | 0.53                                      | 0.00     | 1.35     |
| Autoimmune liver disease | South East Coast       | 50-59        | 0.66                                      | 0.00     | 1.55     |
| Autoimmune liver disease | England                | 50-59        | 0.70                                      | 0.36     | 1.04     |
| Autoimmune liver disease | North East             | 60-69        | 2.06                                      | 0.00     | 6.48     |
| Autoimmune liver disease | North West             | 60-69        | 1.28                                      | 0.00     | 2.61     |
| Autoimmune liver disease | Yorkshire & The Humber | 60-69        | 0.68                                      | 0.00     | 2.37     |
| Autoimmune liver disease | East Midlands          | 60-69        | NA                                        | NA       | NA       |
| Autoimmune liver disease | West Midlands          | 60-69        | 1.04                                      | 0.00     | 2.41     |
| Autoimmune liver disease | East of England        | 60-69        | 0.51                                      | 0.00     | 1.47     |
| Autoimmune liver disease | South West             | 60-69        | 1.05                                      | 0.00     | 2.32     |
| Autoimmune liver disease | South Central          | 60-69        | 0.91                                      | 0.00     | 2.11     |
| Autoimmune liver disease | London                 | 60-69        | 0.77                                      | 0.00     | 1.98     |
| Autoimmune liver disease | South East Coast       | 60-69        | 1.36                                      | 0.00     | 2.78     |
| Autoimmune liver disease | England                | 60-69        | 1.00                                      | 0.54     | 1.45     |
| Autoimmune liver disease | North East             | 70-79        | 1.40                                      | 0.00     | 5.65     |
| Autoimmune liver disease | North West             | 70-79        | 1.13                                      | 0.00     | 2.54     |
| Autoimmune liver disease | Yorkshire & The Humber | 70-79        | NA                                        | NA       | NA       |
| Autoimmune liver disease | East Midlands          | 70-79        | 0.77                                      | 0.00     | 3.09     |
| Autoimmune liver disease | West Midlands          | 70-79        | 0.82                                      | 0.00     | 2.17     |
| Autoimmune liver disease | East of England        | 70-79        | 1.17                                      | 0.00     | 2.85     |
| Autoimmune liver disease | South West             | 70-79        | 1.23                                      | 0.00     | 2.75     |
| Autoimmune liver disease | South Central          | 70-79        | 0.75                                      | 0.00     | 1.99     |
| Autoimmune liver disease | London                 | 70-79        | 0.87                                      | 0.00     | 2.44     |
| Autoimmune liver disease | South East Coast       | 70-79        | 0.84                                      | 0.00     | 2.08     |
| Autoimmune liver disease | England                | 70-79        | 0.95                                      | 0.45     | 1.45     |
| Autoimmune liver disease | North East             | 80 and above | NA                                        | NA       | NA       |
| Autoimmune liver disease | North West             | 80 and above | 0.42                                      | 0.00     | 1.49     |
| Autoimmune liver disease | Yorkshire & The Humber | 80 and above | NA                                        | NA       | NA       |
| Autoimmune liver disease | East Midlands          | 80 and above | 0.66                                      | 0.00     | 3.25     |
| Autoimmune liver disease | West Midlands          | 80 and above | 0.36                                      | 0.00     | 1.42     |
| Autoimmune liver disease | East of England        | 80 and above | 0.38                                      | 0.00     | 1.47     |
| Autoimmune liver disease | South West             | 80 and above | 0.23                                      | 0.00     | 1.00     |
| Autoimmune liver disease | South Central          | 80 and above | 0.49                                      | 0.00     | 1.68     |
| Autoimmune liver disease | London                 | 80 and above | 0.60                                      | 0.00     | 2.09     |
| Autoimmune liver disease | South East Coast       | 80 and above | 0.39                                      | 0.00     | 1.38     |
| Autoimmune liver disease | England                | 80 and above | 0.40                                      | 0.02     | 0.79     |
| HBV                      | North East             | 30-39        | NA                                        | NA       | NA       |
| HBV                      | North West             | 30-39        | 0.71                                      | 0.00     | 1.77     |
| HBV                      | Yorkshire & The Humber | 30-39        | NA                                        | NA       | NA       |
| HBV                      | East Midlands          | 30-39        | NA                                        | NA       | NA       |
| HBV                      | West Midlands          | 30-39        | 1.38                                      | 0.00     | 3.13     |
| HBV                      | East of England        | 30-39        | 1.11                                      | 0.00     | 2.76     |
| HBV                      | South West             | 30-39        | 1.12                                      | 0.00     | 2.68     |
| HBV                      | South Central          | 30-39        | 0.93                                      | 0.00     | 2.25     |
| HBV                      | London                 | 30-39        | 2.42                                      | 0.66     | 4.18     |
| HBV                      | South East Coast       | 30-39        | 0.75                                      | 0.00     | 1.85     |
| HBV                      | England                | 30-39        | 1.21                                      | 0.67     | 1.75     |
| HBV                      | North East             | 40-49        | NA                                        | NA       | NA       |
| HBV                      | North West             | 40-49        | 0.83                                      | 0.00     | 1.82     |
| HBV                      | Yorkshire & The Humber | 40-49        | NA                                        | NA       | NA       |
| HBV                      | East Midlands          | 40-49        | NA                                        | NA       | NA       |
| HBV                      | West Midlands          | 40-49        | 0.52                                      | 0.00     | 1.43     |
| HBV                      | East of England        | 40-49        | 0.59                                      | 0.00     | 1.53     |
| HBV                      | South West             | 40-49        | 0.34                                      | 0.00     | 1.06     |
| HBV                      | South Central          | 40-49        | 0.45                                      | 0.00     | 1.22     |
| HBV                      | London                 | 40-49        | 2.08                                      | 0.58     | 3.58     |
