# Supplementary material for: Increased burden of cardiovascular disease in people with liver disease: unequal geographical variations, risk factors and excess years of life lost
Source: Springer Nature journal article supplement (doi:10.1186/s12967-021-03210-9), 2022-01-03
Supplement: MOESM7 [file 19991640]

**Additional file 7. Age-standardised incidence rates for cardiovascular disease in patients with liver**

| Liver disease type       | Practice region        | Incidence rate (per 100,000 person years) | Lower CI | Upper CI |
|--------------------------|------------------------|-------------------------------------------|----------|----------|
| Any liver disease        | North East             | 3,179.00                                  | 2,422.97 | 3,935.03 |
| Any liver disease        | North West             | 2,960.34                                  | 2,703.90 | 3,216.78 |
| Any liver disease        | Yorkshire & The Humber | 2,559.82                                  | 1,987.19 | 3,132.45 |
| Any liver disease        | East Midlands          | 2,856.19                                  | 2,202.45 | 3,509.92 |
| Any liver disease        | West Midlands          | 2,548.04                                  | 2,194.39 | 2,901.70 |
| Any liver disease        | East of England        | 2,465.08                                  | 2,112.92 | 2,817.24 |
| Any liver disease        | South West             | 2,626.68                                  | 2,322.48 | 2,930.87 |
| Any liver disease        | South Central          | 2,571.68                                  | 2,238.61 | 2,904.75 |
| Any liver disease        | London                 | 2,587.40                                  | 2,321.93 | 2,852.86 |
| Any liver disease        | South East Coast       | 2,420.22                                  | 2,098.16 | 2,742.28 |
| Any liver disease        | England                | 2,634.56                                  | 2,524.35 | 2,744.78 |
| ALD                      | North East             | 3,826.94                                  | 2,431.06 | 5,222.82 |
| ALD                      | North West             | 3,677.71                                  | 3,184.45 | 4,170.97 |
| ALD                      | Yorkshire & The Humber | 2,804.66                                  | 1,767.17 | 3,842.14 |
| ALD                      | East Midlands          | 3,116.80                                  | 1,952.88 | 4,280.71 |
| ALD                      | West Midlands          | 3,129.29                                  | 2,497.71 | 3,760.87 |
| ALD                      | East of England        | 3,022.21                                  | 2,285.28 | 3,759.13 |
| ALD                      | South West             | 2,765.31                                  | 2,191.18 | 3,339.44 |
| ALD                      | South Central          | 2,945.78                                  | 2,280.22 | 3,611.35 |
| ALD                      | London                 | 3,339.78                                  | 2,740.14 | 3,939.43 |
| ALD                      | South East Coast       | 3,025.06                                  | 2,371.32 | 3,678.79 |
| ALD                      | England                | 3,173.27                                  | 2,955.29 | 3,391.26 |
| Autoimmune liver disease | North East             | 3,512.42                                  | 652.94   | 6,371.89 |
| Autoimmune liver disease | North West             | 2,817.86                                  | 1,834.20 | 3,801.51 |
| Autoimmune liver disease | Yorkshire & The Humber | 1,329.06                                  | 77.78    | 2,580.34 |
| Autoimmune liver disease | East Midlands          | 1,776.37                                  | 63.53    | 3,489.20 |
| Autoimmune liver disease | West Midlands          | 1,249.10                                  | 405.76   | 2,092.45 |
| Autoimmune liver disease | East of England        | 2,504.67                                  | 1,282.96 | 3,726.39 |
| Autoimmune liver disease | South West             | 2,080.02                                  | 1,078.49 | 3,081.55 |
| Autoimmune liver disease | South Central          | 1,817.02                                  | 817.93   | 2,816.10 |
| Autoimmune liver disease | London                 | 2,216.58                                  | 1,231.04 | 3,202.12 |
| Autoimmune liver disease | South East Coast       | 2,078.04                                  | 1,134.48 | 3,021.60 |
| Autoimmune liver disease | England                | 2,084.81                                  | 1,731.82 | 2,437.81 |
| HBV                      | North East             | NA                                        | NA       | NA       |
| HBV                      | North West             | 1,670.97                                  | 1,117.50 | 2,224.44 |
| HBV                      | Yorkshire & The Humber | NA                                        | NA       | NA       |
| HBV                      | East Midlands          | 2,015.42                                  | 295.72   | 3,735.13 |
| HBV                      | West Midlands          | 3,119.52                                  | 1,925.81 | 4,313.23 |
| HBV                      | East of England        | 1,182.07                                  | 494.74   | 1,869.39 |
| HBV                      | South West             | 1,254.62                                  | 655.59   | 1,853.65 |
| HBV                      | South Central          | 1,483.32                                  | 780.74   | 2,185.91 |
| HBV                      | London                 | 1,668.56                                  | 1,164.91 | 2,172.20 |
| HBV                      | South East Coast       | 1,378.24                                  | 610.86   | 2,145.61 |
| HBV                      | England                | 1,550.04                                  | 1,312.60 | 1,787.48 |
| HCV                      | North East             | 2,634.96                                  | 701.28   | 4,568.64 |
| HCV                      | North West             | 2,811.84                                  | 2,249.37 | 3,374.31 |
| HCV                      | Yorkshire & The Humber | 1,543.42                                  | 387.24   | 2,699.60 |
| HCV                      | East Midlands          | 525.88                                    | 0.00     | 1,184.04 |
| HCV                      | West Midlands          | 3,674.50                                  | 2,442.75 | 4,906.25 |
| HCV                      | East of England        | 1,906.32                                  | 1,193.89 | 2,618.76 |
| HCV                      | South West             | 1,685.73                                  | 1,121.44 | 2,250.02 |
| HCV                      | South Central          | 3,713.75                                  | 2,706.46 | 4,721.05 |
| HCV                      | London                 | 1,645.29                                  | 1,166.84 | 2,123.74 |
| HCV                      | South East Coast       | 2,826.50                                  | 1,791.92 | 3,861.09 |
| HCV                      | England                | 1,999.59                                  | 1,766.44 | 2,232.74 |
| NAFLD                    | North East             | 2,813.15                                  | 1,797.29 | 3,829.01 |
| NAFLD                    | North West             | 3,156.57                                  | 2,758.49 | 3,554.65 |
| NAFLD                    | Yorkshire & The Humber | 2,950.51                                  | 2,016.78 | 3,884.23 |
| NAFLD                    | East Midlands          | 3,325.11                                  | 2,268.82 | 4,381.41 |
| NAFLD                    | West Midlands          | 2,771.89                                  | 2,204.98 | 3,338.80 |
| NAFLD                    | East of England        | 2,834.76                                  | 2,278.13 | 3,391.40 |
| NAFLD                    | South West             | 3,036.92                                  | 2,551.34 | 3,522.50 |
| NAFLD                    | South Central          | 2,746.64                                  | 2,242.82 | 3,250.47 |
| NAFLD                    | London                 | 2,763.51                                  | 2,363.60 | 3,163.41 |
| NAFLD                    | South East Coast       | 2,674.99                                  | 2,201.27 | 3,148.72 |
| NAFLD                    | England                | 2,878.02                                  | 2,708.09 | 3,047.96 |
