# Supplementary material for: Increased burden of cardiovascular disease in people with liver disease: unequal geographical variations, risk factors and excess years of life lost
Source: Springer Nature journal article supplement (doi:10.1186/s12967-021-03210-9), 2022-01-03
Supplement: MOESM8 [file 19991640]

**Additional file 8. Age-standardised incidence rates for cardiovascular disease in patients without liver disease.**

| <b>Practice region</b>            | <b>Incidence rate (per 100,000 person years)</b> | <b>Lower CI</b> | <b>Upper CI</b> |
|-----------------------------------|--------------------------------------------------|-----------------|-----------------|
| <b>North East</b>                 | 1,454.62                                         | 1,400.15        | 1,509.09        |
| <b>North West</b>                 | 1,536.53                                         | 1,515.84        | 1,557.23        |
| <b>Yorkshire &amp; The Humber</b> | 1,302.05                                         | 1,266.20        | 1,337.91        |
| <b>East Midlands</b>              | 1,338.47                                         | 1,298.67        | 1,378.28        |
| <b>West Midlands</b>              | 1,361.91                                         | 1,339.73        | 1,384.09        |
| <b>East of England</b>            | 1,246.88                                         | 1,225.54        | 1,268.22        |
| <b>South West</b>                 | 1,333.81                                         | 1,313.06        | 1,354.55        |
| <b>South Central</b>              | 1,258.65                                         | 1,238.91        | 1,278.38        |
| <b>London</b>                     | 1,290.80                                         | 1,271.45        | 1,310.14        |
| <b>South East Coast</b>           | 1,321.27                                         | 1,302.10        | 1,340.44        |
| <b>England</b>                    | 1,339.65                                         | 1,332.30        | 1,346.99        |
