# Supplementary material for: Increased burden of cardiovascular disease in people with liver disease: unequal geographical variations, risk factors and excess years of life lost
Source: Springer Nature journal article supplement (doi:10.1186/s12967-021-03210-9), 2022-01-03
Supplement: MOESM9 [file 19991640]

Additional file 9. Age-specific incidence rates for cardiovascular disease in patients with liver disease.

| Liver disease type       | Practice region        | Age group    | Incidence rate (per 100,000 person years) | Lower CI | Upper CI |
|--------------------------|------------------------|--------------|-------------------------------------------|----------|----------|
| Any liver disease        | North East             | 40-49        | 278.77                                    | 0.00     | 789.78   |
| Any liver disease        | North East             | 60-69        | 508.66                                    | 0.00     | 1,110.59 |
| Any liver disease        | North East             | 70-79        | 607.41                                    | 0.00     | 1,241.79 |
| Any liver disease        | North East             | 80 and above | 801.53                                    | 0.00     | 1,861.20 |
| Any liver disease        | North East             | 30-39        | NA                                        | NA       | NA       |
| Any liver disease        | North West             | 30-39        | 97.60                                     | 0.00     | 248.40   |
| Any liver disease        | North West             | 40-49        | 168.13                                    | 41.06    | 295.20   |
| Any liver disease        | North West             | 80 and above | 776.84                                    | 101.28   | 1,452.41 |
| Any liver disease        | North West             | 50-59        | 381.82                                    | 211.59   | 552.04   |
| Any liver disease        | North West             | 60-69        | 591.49                                    | 337.95   | 845.02   |
| Any liver disease        | North West             | 70-79        | 944.46                                    | 513.56   | 1,375.37 |
| Any liver disease        | Yorkshire & The Humber | 40-49        | 198.24                                    | 0.00     | 583.82   |
| Any liver disease        | Yorkshire & The Humber | 50-59        | 392.15                                    | 0.00     | 802.15   |
| Any liver disease        | Yorkshire & The Humber | 60-69        | 435.44                                    | 0.00     | 886.20   |
| Any liver disease        | Yorkshire & The Humber | 80 and above | 576.85                                    | 0.00     | 1,918.90 |
| Any liver disease        | Yorkshire & The Humber | 70-79        | 713.24                                    | 0.00     | 1,526.32 |
| Any liver disease        | Yorkshire & The Humber | 30-39        | NA                                        | NA       | NA       |
| Any liver disease        | East Midlands          | 40-49        | 252.54                                    | 0.00     | 671.31   |
| Any liver disease        | East Midlands          | 50-59        | 354.60                                    | 0.00     | 777.38   |
| Any liver disease        | East Midlands          | 60-69        | 534.22                                    | 0.00     | 1,113.09 |
| Any liver disease        | East Midlands          | 80 and above | 792.30                                    | 0.00     | 2,571.15 |
| Any liver disease        | East Midlands          | 70-79        | 922.54                                    | 0.00     | 1,944.32 |
| Any liver disease        | East Midlands          | 30-39        | NA                                        | NA       | NA       |
| Any liver disease        | West Midlands          | 30-39        | 126.96                                    | 0.00     | 404.32   |
| Any liver disease        | West Midlands          | 40-49        | 194.89                                    | 0.00     | 418.45   |
| Any liver disease        | West Midlands          | 80 and above | 633.12                                    | 0.00     | 1,483.30 |
| Any liver disease        | West Midlands          | 50-59        | 393.49                                    | 124.90   | 662.07   |
| Any liver disease        | West Midlands          | 60-69        | 446.15                                    | 150.57   | 754.73   |
| Any liver disease        | West Midlands          | 70-79        | 753.43                                    | 247.93   | 1,216.94 |
| Any liver disease        | East of England        | 40-49        | 180.75                                    | 0.00     | 392.77   |
| Any liver disease        | East of England        | 80 and above | 723.66                                    | 0.00     | 1,536.32 |
| Any liver disease        | East of England        | 50-59        | 308.19                                    | 78.03    | 538.35   |
| Any liver disease        | East of England        | 70-79        | 679.56                                    | 188.12   | 1,171.00 |
| Any liver disease        | East of England        | 60-69        | 544.43                                    | 196.27   | 892.58   |
| Any liver disease        | East of England        | 30-39        | NA                                        | NA       | NA       |
| Any liver disease        | South West             | 40-49        | 113.71                                    | 0.00     | 257.29   |
| Any liver disease        | South West             | 30-39        | 157.63                                    | 0.00     | 424.32   |
| Any liver disease        | South West             | 80 and above | 861.57                                    | 24.25    | 1,698.89 |
| Any liver disease        | South West             | 60-69        | 432.93                                    | 184.89   | 680.97   |
| Any liver disease        | South West             | 50-59        | 417.33                                    | 187.89   | 646.78   |
| Any liver disease        | South West             | 70-79        | 643.51                                    | 233.28   | 1,053.63 |
| Any liver disease        | South Central          | 40-49        | 194.57                                    | 0.00     | 408.65   |
| Any liver disease        | South Central          | 80 and above | 792.03                                    | 0.00     | 1,666.70 |
| Any liver disease        | South Central          | 50-59        | 313.39                                    | 93.93    | 532.85   |
| Any liver disease        | South Central          | 70-79        | 616.67                                    | 196.35   | 1,036.99 |
| Any liver disease        | South Central          | 60-69        | 598.07                                    | 270.15   | 925.99   |
| Any liver disease        | South Central          | 30-39        | NA                                        | NA       | NA       |
| Any liver disease        | London                 | 80 and above | 653.11                                    | 0.00     | 1,332.38 |
| Any liver disease        | London                 | 40-49        | 156.77                                    | 14.95    | 298.59   |
| Any liver disease        | London                 | 50-59        | 329.30                                    | 157.82   | 500.68   |
| Any liver disease        | London                 | 60-69        | 502.81                                    | 255.08   | 760.54   |
| Any liver disease        | London                 | 70-79        | 905.12                                    | 418.42   | 1,391.82 |
| Any liver disease        | London                 | 30-39        | NA                                        | NA       | NA       |
| Any liver disease        | South East Coast       | 40-49        | 139.73                                    | 0.00     | 320.97   |
| Any liver disease        | South East Coast       | 80 and above | 644.45                                    | 0.00     | 1,345.46 |
| Any liver disease        | South East Coast       | 50-59        | 356.39                                    | 113.08   | 599.70   |
| Any liver disease        | South East Coast       | 60-69        | 529.38                                    | 223.46   | 835.30   |
| Any liver disease        | South East Coast       | 70-79        | 694.77                                    | 263.38   | 1,126.16 |
| Any liver disease        | South East Coast       | 30-39        | NA                                        | NA       | NA       |
| Any liver disease        | England                | 30-39        | 84.05                                     | 15.45    | 152.66   |
| Any liver disease        | England                | 40-49        | 168.97                                    | 106.99   | 230.95   |
| Any liver disease        | England                | 50-59        | 366.30                                    | 289.40   | 443.20   |
| Any liver disease        | England                | 60-69        | 518.97                                    | 417.48   | 620.45   |
| Any liver disease        | England                | 80 and above | 730.07                                    | 452.39   | 1,007.75 |
| Any liver disease        | England                | 70-79        | 766.21                                    | 601.94   | 930.48   |
| ALD                      | North East             | 60-69        | 423.48                                    | 0.00     | 1,275.60 |
| ALD                      | North East             | 70-79        | 637.82                                    | 0.00     | 2,159.21 |
| ALD                      | North East             | 50-59        | 697.53                                    | 0.00     | 1,817.02 |
| ALD                      | North East             | 80 and above | 1,375.38                                  | 0.00     | 6,243.54 |
| ALD                      | North East             | 30-39        | NA                                        | NA       | NA       |
| ALD                      | North East             | 40-49        | NA                                        | NA       | NA       |
| ALD                      | North West             | 30-39        | 184.74                                    | 0.00     | 626.73   |
| ALD                      | North West             | 40-49        | 204.12                                    | 0.00     | 455.20   |
| ALD                      | North West             | 80 and above | 874.38                                    | 0.00     | 2,459.11 |
| ALD                      | North West             | 50-59        | 479.26                                    | 164.90   | 793.62   |
| ALD                      | North West             | 60-69        | 749.10                                    | 290.71   | 1,207.48 |
| ALD                      | North West             | 70-79        | 1,186.11                                  | 349.56   | 2,022.66 |
| ALD                      | Yorkshire & The Humber | 50-59        | 598.03                                    | 0.00     | 820.00   |
| ALD                      | Yorkshire & The Humber | 60-69        | 588.72                                    | 0.00     | 1,427.15 |
| ALD                      | Yorkshire & The Humber | 70-79        | 746.40                                    | 0.00     | 2,337.98 |
| ALD                      | Yorkshire & The Humber | 80 and above | 1,022.91                                  | 0.00     | 4,380.92 |
| ALD                      | Yorkshire & The Humber | 30-39        | NA                                        | NA       | NA       |
| ALD                      | Yorkshire & The Humber | 40-49        | NA                                        | NA       | NA       |
| ALD                      | East Midlands          | 50-59        | 350.35                                    | 0.00     | 1,056.45 |
| ALD                      | East Midlands          | 60-69        | 671.45                                    | 0.00     | 1,853.27 |
| ALD                      | East Midlands          | 70-79        | 1,061.21                                  | 0.00     | 3,042.72 |
| ALD                      | East Midlands          | 30-39        | NA                                        | NA       | NA       |
| ALD                      | East Midlands          | 40-49        | NA                                        | NA       | NA       |
| ALD                      | East Midlands          | 80 and above | NA                                        | NA       | NA       |
| ALD                      | West Midlands          | 40-49        | 337.21                                    | 0.00     | 832.66   |
| ALD                      | West Midlands          | 80 and above | 728.30                                    | 0.00     | 2,421.41 |
| ALD                      | West Midlands          | 70-79        | 877.65                                    | 0.00     | 1,769.24 |
| ALD                      | West Midlands          | 60-69        | 518.33                                    | 29.91    | 1,006.75 |
| ALD                      | West Midlands          | 50-59        | 503.23                                    | 36.48    | 969.98   |
| ALD                      | West Midlands          | 30-39        | NA                                        | NA       | NA       |
| ALD                      | East of England        | 40-49        | 263.29                                    | 0.00     | 775.24   |
| ALD                      | East of England        | 50-59        | 392.60                                    | 0.00     | 860.61   |
| ALD                      | East of England        | 60-69        | 539.35                                    | 0.00     | 1,165.57 |
| ALD                      | East of England        | 80 and above | 737.53                                    | 0.00     | 2,875.85 |
| ALD                      | East of England        | 70-79        | 903.78                                    | 0.00     | 1,904.86 |
| ALD                      | East of England        | 30-39        | NA                                        | NA       | NA       |
| ALD                      | South West             | 40-49        | 117.92                                    | 0.00     | 408.17   |
| ALD                      | South West             | 80 and above | 799.05                                    | 0.00     | 2,726.06 |
| ALD                      | South West             | 60-69        | 460.00                                    | 15.44    | 904.56   |
| ALD                      | South West             | 70-79        | 824.45                                    | 38.56    | 1,610.33 |
| ALD                      | South West             | 50-59        | 563.89                                    | 88.98    | 1,038.80 |
| ALD                      | South West             | 30-39        | NA                                        | NA       | NA       |
| ALD                      | South Central          | 40-49        | 225.39                                    | 0.00     | 693.98   |
| ALD                      | South Central          | 50-59        | 417.87                                    | 0.00     | 872.55   |
| ALD                      | South Central          | 80 and above | 742.90                                    | 0.00     | 2,411.25 |
| ALD                      | South Central          | 70-79        | 815.40                                    | 0.00     | 1,695.51 |
| ALD                      | South Central          | 60-69        | 744.23                                    | 122.22   | 1,366.23 |
| ALD                      | South Central          | 30-39        | NA                                        | NA       | NA       |
| ALD                      | London                 | 40-49        | 272.93                                    | 0.00     | 689.22   |
| ALD                      | London                 | 80 and above | 738.85                                    | 0.00     | 2,297.48 |
| ALD                      | London                 | 50-59        | 457.84                                    | 62.02    | 853.65   |
| ALD                      | London                 | 70-79        | 1,074.01                                  | 116.36   | 2,031.66 |
| ALD                      | London                 | 60-69        | 601.80                                    | 129.27   | 1,074.33 |
| ALD                      | London                 | 30-39        | NA                                        | NA       | NA       |
| ALD                      | South East Coast       | 40-49        | 181.62                                    | 0.00     | 559.31   |
| ALD                      | South East Coast       | 80 and above | 495.25                                    | 0.00     | 1,795.64 |
| ALD                      | South East Coast       | 70-79        | 941.57                                    | 6.38     | 1,876.76 |
| ALD                      | South East Coast       | 50-59        | 535.94                                    | 14.67    | 1,057.20 |
| ALD                      | South East Coast       | 60-69        | 778.32                                    | 140.09   | 1,416.54 |
| ALD                      | South East Coast       | 30-39        | NA                                        | NA       | NA       |
| ALD                      | England                | 30-39        | 132.18                                    | 0.00     | 336.36   |
| ALD                      | England                | 40-49        | 227.74                                    | 90.24    | 365.24   |
| ALD                      | England                | 80 and above | 762.86                                    | 152.11   | 1,373.61 |
| ALD                      | England                | 50-59        | 473.67                                    | 321.45   | 625.88   |
| ALD                      | England                | 60-69        | 628.20                                    | 442.01   | 814.38   |
| ALD                      | England                | 70-79        | 948.64                                    | 627.11   | 1,270.16 |
| Autoimmune liver disease | North East             | 70-79        | 1,065.04                                  | 0.00     | 3,992.19 |
| Autoimmune liver disease | North East             | 80 and above | 1,327.30                                  | 0.00     | 6,474.91 |
| Autoimmune liver disease | North East             | 40-49        | NA                                        | NA       | NA       |
| Autoimmune liver disease | North East             | 50-59        | NA                                        | NA       | NA       |
| Autoimmune liver disease | North East             | 60-69        | NA                                        | NA       | NA       |
| Autoimmune liver disease | North West             | 50-59        | 505.55                                    | 0.00     | 1,523.63 |
| Autoimmune liver disease | North West             | 60-69        | 513.14                                    | 0.00     | 1,371.87 |
| Autoimmune liver disease | North West             | 80 and above | 546.52                                    | 0.00     | 1,584.84 |
| Autoimmune liver disease | North West             | 70-79        | 921.34                                    | 0.00     | 2,018.61 |
| Autoimmune liver disease | North West             | 30-39        | NA                                        | NA       | NA       |
| Autoimmune liver disease | North West             | 40-49        | NA                                        | NA       | NA       |
| Autoimmune liver disease | Yorkshire & The Humber | 30-39        | NA                                        | NA       | NA       |
| Autoimmune liver disease | Yorkshire & The Humber | 40-49        | NA                                        | NA       | NA       |
| Autoimmune liver disease | Yorkshire & The Humber | 50-59        | NA                                        | NA       | NA       |
| Autoimmune liver disease | Yorkshire & The Humber | 60-69        | NA                                        | NA       | NA       |
| Autoimmune liver disease | Yorkshire & The Humber | 70-79        | NA                                        | NA       | NA       |
| Autoimmune liver disease | Yorkshire & The Humber | 80 and above | NA                                        | NA       | NA       |
| Autoimmune liver disease | East Midlands          | 70-79        | 1,549.45                                  | 0.00     | 5,228.39 |
| Autoimmune liver disease | East Midlands          | 30-39        | NA                                        | NA       | NA       |
| Autoimmune liver disease | East Midlands          | 40-49        | NA                                        | NA       | NA       |
| Autoimmune liver disease | East Midlands          | 50-59        | NA                                        | NA       | NA       |
| Autoimmune liver disease | East Midlands          | 60-69        | NA                                        | NA       | NA       |
| Autoimmune liver disease | East Midlands          | 80 and above | NA                                        | NA       | NA       |
| Autoimmune liver disease | West Midlands          | 60-69        | 286.67                                    | 0.00     | 993.61   |
| Autoimmune liver disease | West Midlands          | 80 and above | 382.72                                    | 0.00     | 1,744.14 |
| Autoimmune liver disease | West Midlands          | 70-79        | 445.30                                    | 0.00     | 1,447.71 |
| Autoimmune liver disease | West Midlands          | 30-39        | NA                                        | NA       | NA       |
| Autoimmune liver disease | West Midlands          | 40-49        | NA                                        | NA       | NA       |
| Autoimmune liver disease | West Midlands          | 50-59        | NA                                        | NA       | NA       |
| Autoimmune liver disease | East of England        | 70-79        | 268.44                                    | 0.00     | 1,009.17 |
| Autoimmune liver disease | East of England        | 60-69        | 406.77                                    | 0.00     | 1,409.29 |
| Autoimmune liver disease | East of England        | 80 and above | 777.33                                    | 0.00     | 2,416.82 |
| Autoimmune liver disease | East of England        | 30-39        | NA                                        | NA       | NA       |
| Autoimmune liver disease | East of England        | 40-49        | NA                                        | NA       | NA       |
| Autoimmune liver disease | East of England        | 50-59        | NA                                        | NA       | NA       |
| Autoimmune liver disease | South West             | 60-69        | 320.75                                    | 0.00     | 1,187.09 |
| Autoimmune liver disease | South West             | 70-79        | 354.67                                    | 0.00     | 1,153.42 |
| Autoimmune liver disease | South West             | 50-59        | 471.37                                    | 0.00     | 1,594.72 |
| Autoimmune liver disease | South West             | 80 and above | 828.11                                    | 0.00     | 2,574.25 |
| Autoimmune liver disease | South West             | 30-39        | NA                                        | NA       | NA       |
| Autoimmune liver disease | South West             | 40-49        | NA                                        | NA       | NA       |
| Autoimmune liver disease | South Central          | 70-79        | 300.64                                    | 0.00     | 1,068.58 |
| Autoimmune liver disease | South Central          | 80 and above | 476.28                                    | 0.00     | 1,942.86 |
| Autoimmune liver disease | South Central          | 60-69        | 477.33                                    | 0.00     | 1,437.55 |
| Autoimmune liver disease | South Central          | 30-39        | NA                                        | NA       | NA       |
| Autoimmune liver disease | South Central          | 40-49        | NA                                        | NA       | NA       |
| Autoimmune liver disease | London                 | 50-59        | 203.82                                    | 0.00     | 754.66   |
| Autoimmune liver disease | London                 | 80 and above | 854.74                                    | 0.00     | 3,094.99 |
| Autoimmune liver disease | London                 | 70-79        | 1,031.58                                  | 0.00     | 2,547.31 |
| Autoimmune liver disease | London                 | 30-39        | NA                                        | NA       | NA       |
| Autoimmune liver disease | London                 | 40-49        | NA                                        | NA       | NA       |
| Autoimmune liver disease | London                 | 50-59        | NA                                        | NA       | NA       |
| Autoimmune liver disease | South East Coast       | 80 and above | 411.28                                    | 0.00     | 1,445.66 |
| Autoimmune liver disease | South East Coast       | 60-69        | 428.28                                    | 0.00     | 1,245.83 |
| Autoimmune liver disease | South East Coast       | 50-59        | 530.66                                    | 0.00     | 1,684.81 |
| Autoimmune liver disease | South East Coast       | 70-79        | 580.19                                    | 0.00     | 1,666.15 |
| Autoimmune liver disease | South East Coast       | 30-39        | NA                                        | NA       | NA       |
| Autoimmune liver disease | South East Coast       | 40-49        | NA                                        | NA       | NA       |
| Autoimmune liver disease | England                | 40-49        | 124.08                                    | 0.00     | 382.17   |
| Autoimmune liver disease | England                | 50-59        | 338.95                                    | 8.95     | 668.94   |
| Autoimmune liver disease | England                | 80 and above | 580.29                                    | 72.61    | 1,087.98 |
| Autoimmune liver disease | England                | 60-69        | 386.83                                    | 90.21    | 683.44   |
| Autoimmune liver disease | England                | 70-79        | 602.94                                    | 221.89   | 984.00   |
| Autoimmune liver disease | England                | 30-39        | NA                                        | NA       | NA       |
| HBV                      | North East             | 30-39        | NA                                        | NA       | NA       |
| HBV                      | North East             | 40-49        | NA                                        | NA       | NA       |
| HBV                      | North East             | 50-59        | NA                                        | NA       | NA       |
| HBV                      | North East             | 60-69        | NA                                        | NA       | NA       |
| HBV                      | North East             | 70-79        | NA                                        | NA       | NA       |
| HBV                      | North West             | 40-49        | 126.71                                    | 0.00     | 411.38   |
| HBV                      | North West             | 50-59        | 267.79                                    | 0.00     | 680.16   |
| HBV                      | North West             | 70-79        | 405.06                                    | 0.00     | 1,317.05 |
| HBV                      | North West             | 80 and above | 605.73                                    | 0.00     | 2,963.49 |
| HBV                      | North West             | 30-39        | NA                                        | NA       | NA       |
| HBV                      | Yorkshire & The Humber | 30-39        | NA                                        | NA       | NA       |
| HBV                      | Yorkshire & The Humber | 40-49        | NA                                        | NA       | NA       |
| HBV                      | Yorkshire & The Humber |              |                                           |          |          |
