# Supplementary material for: Increased burden of cardiovascular disease in people with liver disease: unequal geographical variations, risk factors and excess years of life lost
Source: Springer Nature journal article supplement (doi:10.1186/s12967-021-03210-9), 2022-01-03
Supplement: MOESM10 [file 19991640]

**Additional file 10. Age-specific incidence rates for cardiovascular disease in patients without liver disease.**

| Practice region        | Age group    | Incidence rate (per 100,000 person years) | Lower CI | Upper CI |
|------------------------|--------------|-------------------------------------------|----------|----------|
| North East             | 30-39        | 13.35                                     | 0.71     | 25.99    |
| North West             | 30-39        | 19.05                                     | 13.65    | 24.45    |
| Yorkshire & The Humber | 30-39        | 17.12                                     | 4.41     | 29.83    |
| East Midlands          | 30-39        | 15.43                                     | 1.05     | 29.81    |
| West Midlands          | 30-39        | 17.89                                     | 11.72    | 24.06    |
| East of England        | 30-39        | 16.36                                     | 10.10    | 22.62    |
| South West             | 30-39        | 15.88                                     | 10.14    | 21.63    |
| South Central          | 30-39        | 13.36                                     | 8.45     | 18.28    |
| London                 | 30-39        | 11.70                                     | 7.93     | 15.47    |
| South East Coast       | 30-39        | 16.39                                     | 11.37    | 21.41    |
| England                | 30-39        | 15.56                                     | 13.66    | 17.46    |
| North East             | 40-49        | 49.60                                     | 28.15    | 71.06    |
| North West             | 40-49        | 53.44                                     | 45.38    | 61.49    |
| Yorkshire & The Humber | 40-49        | 42.02                                     | 28.46    | 55.59    |
| East Midlands          | 40-49        | 43.88                                     | 29.47    | 58.30    |
| West Midlands          | 40-49        | 44.50                                     | 36.08    | 52.91    |
| East of England        | 40-49        | 38.75                                     | 31.11    | 46.39    |
| South West             | 40-49        | 41.09                                     | 33.24    | 48.93    |
| South Central          | 40-49        | 36.05                                     | 29.10    | 43.00    |
| London                 | 40-49        | 35.44                                     | 29.27    | 41.61    |
| South East Coast       | 40-49        | 40.49                                     | 33.41    | 47.56    |
| England                | 40-49        | 41.60                                     | 38.92    | 44.27    |
| North East             | 50-59        | 160.50                                    | 123.32   | 197.67   |
| North West             | 50-59        | 148.10                                    | 134.81   | 161.38   |
| Yorkshire & The Humber | 50-59        | 111.06                                    | 90.29    | 131.83   |
| East Midlands          | 50-59        | 111.57                                    | 89.28    | 133.86   |
| West Midlands          | 50-59        | 122.78                                    | 108.79   | 136.77   |
| East of England        | 50-59        | 109.63                                    | 96.65    | 122.61   |
| South West             | 50-59        | 125.79                                    | 112.59   | 138.98   |
| South Central          | 50-59        | 106.76                                    | 94.82    | 118.70   |
| London                 | 50-59        | 107.13                                    | 95.26    | 119.00   |
| South East Coast       | 50-59        | 112.46                                    | 100.76   | 124.16   |
| England                | 50-59        | 119.54                                    | 114.99   | 124.09   |
| North East             | 60-69        | 251.23                                    | 197.83   | 304.63   |
| North West             | 60-69        | 262.09                                    | 241.32   | 282.86   |
| Yorkshire & The Humber | 60-69        | 201.13                                    | 169.88   | 232.37   |
| East Midlands          | 60-69        | 214.97                                    | 178.17   | 251.78   |
| West Midlands          | 60-69        | 221.28                                    | 199.77   | 242.79   |
| East of England        | 60-69        | 192.41                                    | 172.24   | 212.58   |
| South West             | 60-69        | 209.82                                    | 190.49   | 229.15   |
| South Central          | 60-69        | 197.62                                    | 178.83   | 216.40   |
| London                 | 60-69        | 208.52                                    | 187.32   | 229.72   |
| South East Coast       | 60-69        | 212.53                                    | 193.83   | 231.23   |
| England                | 60-69        | 215.97                                    | 208.80   | 223.14   |
| North East             | 70-79        | 418.45                                    | 331.89   | 505.02   |
| North West             | 70-79        | 446.69                                    | 413.45   | 479.93   |
| Yorkshire & The Humber | 70-79        | 382.98                                    | 328.73   | 437.24   |
| East Midlands          | 70-79        | 386.09                                    | 325.62   | 446.57   |
| West Midlands          | 70-79        | 386.46                                    | 352.74   | 420.18   |
| East of England        | 70-79        | 352.11                                    | 318.61   | 385.61   |
| South West             | 70-79        | 383.64                                    | 352.59   | 414.69   |
| South Central          | 70-79        | 354.87                                    | 324.23   | 385.51   |
| London                 | 70-79        | 375.03                                    | 337.66   | 412.40   |
| South East Coast       | 70-79        | 375.68                                    | 345.80   | 405.55   |
| England                | 70-79        | 384.39                                    | 372.71   | 396.08   |
| North East             | 80 and above | 561.48                                    | 430.18   | 692.78   |
| North West             | 80 and above | 607.17                                    | 553.58   | 660.76   |
| Yorkshire & The Humber | 80 and above | 547.74                                    | 461.21   | 634.28   |
| East Midlands          | 80 and above | 566.52                                    | 469.69   | 663.35   |
| West Midlands          | 80 and above | 569.00                                    | 514.63   | 623.37   |
| East of England        | 80 and above | 537.62                                    | 484.18   | 591.07   |
| South West             | 80 and above | 557.60                                    | 508.56   | 606.63   |
| South Central          | 80 and above | 549.98                                    | 498.69   | 601.27   |
| London                 | 80 and above | 552.98                                    | 494.52   | 611.43   |
| South East Coast       | 80 and above | 563.73                                    | 515.47   | 611.99   |
| England                | 80 and above | 562.59                                    | 543.85   | 581.32   |
