# Supplementary material for: Increased burden of cardiovascular disease in people with liver disease: unequal geographical variations, risk factors and excess years of life lost
Source: Springer Nature journal article supplement (doi:10.1186/s12967-021-03210-9), 2022-01-03
Supplement: MOESM11 [file 19991640]

Additional file 11. Factors associated with the initial presentation of cardiovascular disease in individuals with liver disease

| Characteristic                             | ALD                   |         | Autoimmune liver disease |         | HBV                   |         | HCV                  |         | NAFLD                 |         |
|--------------------------------------------|-----------------------|---------|--------------------------|---------|-----------------------|---------|----------------------|---------|-----------------------|---------|
|                                            | Fully adjusted HR     | P value | Fully adjusted HR        | P value | Fully adjusted HR     | P value | Fully adjusted HR    | P value | Fully adjusted HR     | P value |
| Female                                     | 0.72 (0.67 - 0.78)    | < 0.001 | 0.53 (0.45 - 0.64)       | < 0.001 | 0.67 (0.52 - 0.87)    | 0.003   | 0.73 (0.6 - 0.88)    | 0.001   | 0.71 (0.67 - 0.76)    | < 0.001 |
| <b>Age</b>                                 |                       |         |                          |         |                       |         |                      |         |                       |         |
| Age 30 - 39 (reference)                    | 1.00 (ref)            |         | 1.00 (ref)               |         | 1.00 (ref)            |         | 1.00 (ref)           |         | 1.00 (ref)            |         |
| Age 40 - 49                                | 1.6 (1.33 - 1.92)     | < 0.001 | 3.27 (1.47 - 7.25)       | 0.004   | 2.67 (1.63 - 4.39)    | < 0.001 | 1.49 (1.14 - 1.94)   | 0.003   | 2.2 (1.8 - 2.7)       | < 0.001 |
| Age 50 - 59                                | 2.93 (2.47 - 3.47)    | < 0.001 | 4.77 (2.21 - 10.29)      | < 0.001 | 5.44 (3.4 - 8.71)     | < 0.001 | 2.56 (1.96 - 3.36)   | < 0.001 | 3.79 (3.12 - 4.6)     | < 0.001 |
| Age 60 - 69                                | 4.98 (4.2 - 5.91)     | < 0.001 | 9.33 (4.38 - 19.85)      | < 0.001 | 11.29 (6.89 - 18.49)  | < 0.001 | 4.67 (3.46 - 6.29)   | < 0.001 | 6.87 (5.67 - 8.32)    | < 0.001 |
| Age 70 - 79                                | 8.13 (6.75 - 9.79)    | < 0.001 | 18.43 (8.67 - 39.16)     | < 0.001 | 24.15 (13.85 - 42.11) | < 0.001 | 8.83 (6.08 - 12.84)  | < 0.001 | 12.67 (10.43 - 15.39) | < 0.001 |
| Age 80 & above                             | 16.13 (12.67 - 20.53) | < 0.001 | 36.9 (17.09 - 79.68)     | < 0.001 | 38.53 (19.6 - 75.76)  | < 0.001 | 17.41 (10.5 - 28.87) | < 0.001 | 22.1 (17.96 - 27.19)  | < 0.001 |
| BMI ≥ 30 kg/m2                             | 1.2 (1.11 - 1.3)      | < 0.001 | 1.4 (1.17 - 1.67)        | < 0.001 | 1.5 (1.12 - 2)        | 0.006   | 1.3 (1.03 - 1.64)    | 0.028   | 1.22 (1.15 - 1.3)     | < 0.001 |
| <b>Smoking</b>                             |                       |         |                          |         |                       |         |                      |         |                       |         |
| Non smoker (reference)                     | 1.00 (ref)            |         | 1.00 (ref)               |         | 1.00 (ref)            |         | 1.00 (ref)           |         | 1.00 (ref)            |         |
| Current smoker                             | 1.3 (1.18 - 1.43)     | < 0.001 | 1.78 (1.45 - 2.18)       | < 0.001 | 1.74 (1.25 - 2.43)    | 0.001   | 1.23 (0.95 - 1.6)    | 0.108   | 1.77 (1.64 - 1.91)    | < 0.001 |
| Ex smoker                                  | 1.12 (1.01 - 1.24)    | 0.034   | 1.45 (1.2 - 1.74)        | < 0.001 | 1.35 (0.97 - 1.86)    | 0.074   | 1.06 (0.79 - 1.41)   | 0.707   | 1.32 (1.23 - 1.42)    | < 0.001 |
| Any smoker                                 | 1.01 (0.38 - 2.69)    | 0.989   | 11.14 (3.55 - 34.96)     | < 0.001 |                       |         |                      |         | 1.49 (0.62 - 3.59)    | 0.373   |
| No smoking information                     | 1.15 (0.97 - 1.37)    | 0.097   | 1.34 (0.9 - 1.99)        | 0.149   | 0.95 (0.57 - 1.59)    | 0.847   | 0.94 (0.6 - 1.46)    | 0.772   | 1.47 (1.1 - 1.95)     | 0.009   |
| <b>Comorbidities prior to cohort entry</b> |                       |         |                          |         |                       |         |                      |         |                       |         |
| Barrett's oesophagus                       | 1.19 (0.9 - 1.59)     | 0.226   | 0.73 (0.35 - 1.55)       | 0.417   | 0.85 (0.12 - 6.09)    | 0.872   | 0.96 (0.36 - 2.59)   | 0.942   | 1.38 (1.12 - 1.7)     | 0.002   |
| Crohn's disease                            | 0.69 (0.36 - 1.33)    | 0.27    | 0.67 (0.33 - 1.35)       | 0.261   | 1.68 (0.53 - 5.32)    | 0.375   | 1.26 (0.41 - 3.94)   | 0.686   | 0.94 (0.69 - 1.29)    | 0.716   |
| Diverticular disease of intestine          | 1.02 (0.86 - 1.2)     | 0.832   | 1.37 (1.07 - 1.76)       | 0.012   | 0.72 (0.36 - 1.42)    | 0.343   | 1.61 (0.94 - 2.76)   | 0.086   | 1.17 (1.06 - 1.29)    | 0.002   |
| Diabetes mellitus                          | 1.52 (1.38 - 1.66)    | < 0.001 | 1.63 (1.34 - 1.98)       | < 0.001 | 1.82 (1.32 - 2.53)    | < 0.001 | 1.87 (1.47 - 2.38)   | < 0.001 | 1.59 (1.49 - 1.69)    | < 0.001 |
| Complications of diabetes                  | 1.62 (1.37 - 1.92)    | < 0.001 | 1.63 (1.19 - 2.25)       | 0.002   | 1.5 (0.83 - 2.71)     | 0.178   | 2.8 (1.98 - 3.97)    | < 0.001 | 1.73 (1.58 - 1.9)     | < 0.001 |
| Dyslipidaemia                              | 1.22 (1.11 - 1.34)    | < 0.001 | 1.09 (0.88 - 1.36)       | 0.437   | 1.27 (0.88 - 1.84)    | 0.197   | 1.86 (1.32 - 2.6)    | < 0.001 | 1.25 (1.17 - 1.34)    | < 0.001 |
| Gastro-oesophageal reflux disease          | 1.09 (0.98 - 1.22)    | 0.107   | 1.32 (1.06 - 1.64)       | 0.013   | 1.01 (0.66 - 1.55)    | 0.957   | 0.99 (0.74 - 1.34)   | 0.97    | 1.17 (1.09 - 1.26)    | < 0.001 |
| Hypertension                               | 1.34 (1.25 - 1.44)    | < 0.001 | 1.29 (1.1 - 1.52)        | 0.002   | 2.1 (1.59 - 2.77)     | < 0.001 | 1.69 (1.36 - 2.11)   | < 0.001 | 1.46 (1.37 - 1.56)    | < 0.001 |
| Irritable bowel syndrome                   | 1.02 (0.88 - 1.2)     | 0.768   | 0.93 (0.71 - 1.22)       | 0.605   | 0.51 (0.26 - 1)       | 0.049   | 0.77 (0.51 - 1.16)   | 0.208   | 0.97 (0.88 - 1.07)    | 0.58    |
| Jaundice                                   | 1.05 (0.92 - 1.2)     | 0.467   | 0.83 (0.65 - 1.06)       | 0.132   | 0.98 (0.63 - 1.53)    | 0.925   | 1.49 (1.01 - 2.22)   | 0.047   | 1.08 (0.91 - 1.29)    | 0.366   |
| Proteinuric kidney diseases                | 1.62 (1.16 - 2.25)    | 0.004   | 2.84 (1.67 - 4.83)       | < 0.001 | 2.88 (1.56 - 5.3)     | 0.001   | 2.32 (1.42 - 3.79)   | 0.001   | 1.73 (1.42 - 2.1)     | < 0.001 |
| Oesophagitis and oesophageal ulcer         | 1.21 (1.08 - 1.35)    | 0.001   | 1.46 (1.14 - 1.86)       | 0.003   | 0.59 (0.34 - 1.04)    | 0.069   | 1.14 (0.8 - 1.61)    | 0.469   | 1.22 (1.12 - 1.33)    | < 0.001 |
| Proteinuria                                | 1.1 (1.02 - 1.18)     | 0.009   | 1.14 (0.97 - 1.33)       | 0.108   | 1.66 (1.27 - 2.16)    | < 0.001 | 1.18 (0.98 - 1.42)   | 0.087   | 1.19 (1.12 - 1.27)    | < 0.001 |
| Renal disease                              | 1.39 (1.22 - 1.6)     | < 0.001 | 1.69 (1.37 - 2.08)       | < 0.001 | 2.12 (1.46 - 3.09)    | < 0.001 | 2.03 (1.49 - 2.77)   | < 0.001 | 1.44 (1.33 - 1.56)    | < 0.001 |
| <b>Biomarkers at cohort entry</b>          |                       |         |                          |         |                       |         |                      |         |                       |         |
| Albumin < 35 g/L                           | 1.2 (1.1 - 1.32)      | < 0.001 | 1.55 (1.26 - 1.91)       | < 0.001 | 2.39 (1.54 - 3.71)    | < 0.001 | 1.75 (1.29 - 2.39)   | < 0.001 | 1.59 (1.42 - 1.79)    | < 0.001 |
| Alanine aminotransferase ≥ 35 U/L          | 0.85 (0.78 - 0.93)    | 0.001   | 0.95 (0.8 - 1.14)        | 0.609   | 0.96 (0.65 - 1.44)    | 0.858   | 0.85 (0.67 - 1.07)   | 0.163   | 0.82 (0.75 - 0.9)     | < 0.001 |
| Aspartate transaminase ≥ 40 U/L            | 1.01 (0.89 - 1.15)    | 0.862   | 1.05 (0.8 - 1.37)        | 0.712   | 1.11 (0.62 - 2)       | 0.723   | 0.75 (0.5 - 1.15)    | 0.186   | 0.97 (0.83 - 1.15)    | 0.76    |
| Bilirubin ≥ 34.2 µmol/L                    | 1.04 (0.93 - 1.16)    | 0.485   | 1.23 (0.94 - 1.6)        | 0.137   | 1.46 (0.87 - 2.43)    | 0.149   | 1.31 (0.82 - 2.1)    | 0.261   | 1.11 (0.92 - 1.32)    | 0.279   |
| C reactive protein ≥ 10 mg/L               | 1.26 (1.09 - 1.44)    | 0.001   | 1.15 (0.89 - 1.48)       | 0.28    | 0.74 (0.33 - 1.67)    | 0.463   | 1.11 (0.67 - 1.83)   | 0.679   | 1.32 (1.18 - 1.47)    | < 0.001 |
| Gamma- glutamyltransferase ≥ 48 U/L        | 0.96 (0.89 - 1.04)    | 0.35    | 1.01 (0.85 - 1.2)        | 0.936   | 1.64 (1.06 - 2.55)    | 0.028   | 0.83 (0.61 - 1.13)   | 0.246   | 1.04 (0.95 - 1.13)    | 0.438   |
| International Normalized Ratio ≥ 1.7       | 1.31 (0.94 - 1.83)    | 0.113   | 3.49 (2.11 - 5.79)       | < 0.001 | 2.46 (1 - 6.06)       | 0.05    | 6.43 (3.18 - 13.03)  | < 0.001 | 1.46 (1.18 - 1.81)    | < 0.001 |
| Platelet ≤ 150 10 <sup>9</sup> /L          | 1.18 (1.08 - 1.29)    | < 0.001 | 1.25 (0.96 - 1.63)       | 0.095   | 1.59 (1.05 - 2.39)    | 0.028   | 1.17 (0.89 - 1.53)   | 0.254   | 1.48 (1.32 - 1.67)    | < 0.001 |
| Triglycerides ≥ 2 mmol/L                   | 0.94 (0.83 - 1.07)    | 0.37    | 1.13 (0.8 - 1.62)        | 0.485   | 1.03 (0.51 - 2.08)    | 0.943   | 1.55 (1 - 2.41)      | 0.051   | 1.19 (1.1 - 1.29)     | < 0.001 |
