# Supplementary material for: Increased burden of cardiovascular disease in people with liver disease: unequal geographical variations, risk factors and excess years of life lost
Source: Springer Nature journal article supplement (doi:10.1186/s12967-021-03210-9), 2022-01-03
Supplement: MOESM12 [file 19991640]

### Additional file 12. Sensitivity analyses on complete records

| Characteristic                            | Adjusted HR           | P value | Liver disease type       |
|-------------------------------------------|-----------------------|---------|--------------------------|
| BMI $\geq$ 30 kg/m <sup>2</sup>           | 1.21 ( 1.12 - 1.32 )  | < 0.001 | ALD                      |
| BMI $\geq$ 30 kg/m <sup>2</sup>           | 1.37 ( 1.14 - 1.65 )  | 0.001   | Autoimmune liver disease |
| BMI $\geq$ 30 kg/m <sup>2</sup>           | 1.52 ( 1.13 - 2.05 )  | 0.006   | HBV                      |
| BMI $\geq$ 30 kg/m <sup>2</sup>           | 1.31 ( 1.03 - 1.66 )  | 0.027   | HCV                      |
| BMI $\geq$ 30 kg/m <sup>2</sup>           | 1.24 ( 1.16 - 1.31 )  | < 0.001 | NAFLD                    |
| Alanine aminotransferase $\geq$ 35 U/L    | 0.73 ( 0.64 - 0.84 )  | < 0.001 | ALD                      |
| Alanine aminotransferase $\geq$ 35 U/L    | 0.68 ( 0.52 - 0.9 )   | 0.008   | Autoimmune liver disease |
| Alanine aminotransferase $\geq$ 35 U/L    | 0.82 ( 0.47 - 1.44 )  | 0.496   | HBV                      |
| Alanine aminotransferase $\geq$ 35 U/L    | 0.88 ( 0.58 - 1.33 )  | 0.537   | HCV                      |
| Alanine aminotransferase $\geq$ 35 U/L    | 0.73 ( 0.65 - 0.83 )  | < 0.001 | NAFLD                    |
| Albumin < 35 g/L                          | 1.26 ( 1.14 - 1.39 )  | < 0.001 | ALD                      |
| Albumin < 35 g/L                          | 1.57 ( 1.26 - 1.96 )  | < 0.001 | Autoimmune liver disease |
| Albumin < 35 g/L                          | 2.14 ( 1.32 - 3.46 )  | 0.002   | HBV                      |
| Albumin < 35 g/L                          | 1.99 ( 1.42 - 2.78 )  | < 0.001 | HCV                      |
| Albumin < 35 g/L                          | 1.6 ( 1.42 - 1.8 )    | < 0.001 | NAFLD                    |
| C reactive protein $\geq$ 10 mg/L         | 1.47 ( 1.22 - 1.77 )  | < 0.001 | ALD                      |
| C reactive protein $\geq$ 10 mg/L         | 1.34 ( 0.97 - 1.85 )  | 0.074   | Autoimmune liver disease |
| C reactive protein $\geq$ 10 mg/L         | 0.78 ( 0.28 - 2.2 )   | 0.638   | HBV                      |
| C reactive protein $\geq$ 10 mg/L         | 1.36 ( 0.76 - 2.43 )  | 0.306   | HCV                      |
| C reactive protein $\geq$ 10 mg/L         | 1.45 ( 1.26 - 1.65 )  | < 0.001 | NAFLD                    |
| International Normalized Ratio $\geq$ 1.7 | 1.28 ( 0.84 - 1.95 )  | 0.25    | ALD                      |
| International Normalized Ratio $\geq$ 1.7 | 4.14 ( 1.98 - 8.67 )  | < 0.001 | Autoimmune liver disease |
| International Normalized Ratio $\geq$ 1.7 | 3.09 ( 0.75 - 12.68 ) | 0.117   | HBV                      |
| International Normalized Ratio $\geq$ 1.7 | 7.81 ( 2.22 - 27.48 ) | 0.001   | HCV                      |
| International Normalized Ratio $\geq$ 1.7 | 1.51 ( 1.02 - 2.23 )  | 0.038   | NAFLD                    |
