# Supplementary material for: Increased burden of cardiovascular disease in people with liver disease: unequal geographical variations, risk factors and excess years of life lost
Source: Springer Nature journal article supplement (doi:10.1186/s12967-021-03210-9), 2022-01-03
Supplement: MOESM13 [file 19991640]

## **Additional file 13: Supplementary methods and results**

### ***Regional variations in age-standardised and age-specific incidence rates for liver disease***

An exploration of regional variations revealed that the patterns of incidence burden differed across liver diseases (Additional file 5). North West England had the highest age-standardised incidence rate for any liver disease (151 per 100,000 person years), while the lowest incidence rate was observed in Yorkshire and the Humber (87 per 100,000 person years) (Figure 1A, Additional file 5).

Delving into specific liver diseases, regions with the highest incidence rates were as follow: ALD (North West; 35 per 100,000 person years), autoimmune liver disease (North East; 6 per 100,000 person years), HBV (London; 11 per 100,000 person years), HCV (North East; 10 per 100,000 person years) and NAFLD (London; 116 per 100,000 person years). The North West and North East regions consistently exhibited relatively high age-standardised incidence rates for individual liver diseases (except for HBV), while the regions in the east of England (i.e., Yorkshire and The Humber, East Midlands and East of England), had consistently low incidence rates (Figure 1A, Additional file 5). For HBV, however, we found that London had a much higher incidence rate compared to all other regions (11 in London vs. 0.8 to 3.6 per 100,000 person years in other regions).

Regionally, the maximum incidence for any liver disease was reached in individuals aged 50-59 for all regions except the West Midlands (where incidence peaked in individuals age 60-69) (Additional file 6). Additional age-specific incidence rates by specific liver disease type and geographical regions were provided in Additional file 6.

### ***Regional variations in age-standardised and age-specific incidence rates for CVD in patients with or without liver disease***

When exploring regional differences in patients with liver disease, individuals from the North East (3,179 per 100,000 person years, CI: 2,423-3,935) and North West (2,960 per 100,000 person years, CI: 2,704-3,217) had the highest and second highest incidence burdens for CVD, respectively (Figure 2A, Additional file 7). Similarly, the North West region had the highest incidence for CVD in people without liver disease (1,537 per 100,000 person years) (Figure 2B, Additional file 8). In individuals with liver disease, the lowest CVD incidence was observed in the South East region (2,420 per 100,000 person years, CI: 2,098-2,742) (Figure 2A, Additional file 7). However, in people without liver disease, East of England had the lowest CVD incidence rate (1,226 per 100,000 person years) (Figure 2B, Additional file 8).

Variation rates were more striking when comparing liver disease types. Regions with the highest incidence burdens of CVD by liver disease type were as follow: ALD (North East; 3,827 per 100,000 person years), autoimmune (North East; 3,512 per 100,000 person years), HBV (West Midlands; 3,119 per 100,000 person years), HCV (South Central; 3,714 per 100,000 person years) and NAFLD (East Midlands; 3,325 per 100,000 person years) (Figure 2A, Additional file 7).

When investigating regional variations in age-specific incidence rates, the highest CVD incidence in people with and without liver disease was observed in individuals aged 70 and above across all regions (Additional file 9, Additional file 10).

## ***Comorbidity patterns in patients with liver disease***

We analysed comorbidity patterns for 14 prevalent conditions stratified by liver disease type, age group and sex (Additional file 1). Comorbidities were common in people with liver disease. A general trend of increased in diagnosed comorbidities was observed across all liver diseases. Men with autoimmune liver disease had an increased prevalence of Crohn's disease especially in the younger age groups: age 30-39 (8.3%) and age 40-49 (11.8%) (Additional file 1). The prevalence of Barrett's oesophagus, renal disease, diabetes mellitus, complications of diabetes, diverticular disease of the intestine, dyslipidaemia and hypertension exhibited an upward trend with increasing age and displayed consistent patterns across the five liver conditions. Among patients with HBV at ages 70-79, diabetes was present in 31.5% men and 29.0% women, whereas, in patients aged 40-49, the proportions were 7.2% and 6.5% in men and women respectively. Similarly, among patients with NAFLD, renal disease was present in 18.3% men and 23.5% women of ages 70-79, whereas, in patients aged 40-49, only 3.3% men and 8.6% women had renal disease (Additional file 1).

## **Liver disease phenotypes**

### **NAFLD**

| Code    | Description                                       | Coding system | Data source    |
|---------|---------------------------------------------------|---------------|----------------|
| J61y700 | Steatosis of liver                                | Read code v2  | Primary care   |
| J61y900 | Fatty change of liver                             | Read code v2  | Primary care   |
| J61y911 | Fatty liver                                       | Read code v2  | Primary care   |
| J61y100 | Nonalcoholic fatty liver disease                  | Read code v2  | Primary care   |
| J61y800 | Nonalcoholic steatohepatitis                      | Read code v2  | Primary care   |
| K76.0   | Fatty (change of) liver, not elsewhere classified | ICD-10        | Secondary care |

### **Alcoholic liver disease**

| Code    | Description                                             | Coding system | Data source    |
|---------|---------------------------------------------------------|---------------|----------------|
| G852300 | Oesophageal varices in alcoholic cirrhosis of the liver | Read code v2  | Primary care   |
| J610.00 | Alcoholic fatty liver                                   | Read code v2  | Primary care   |
| J612.00 | Alcoholic cirrhosis of liver                            | Read code v2  | Primary care   |
| J612.12 | Laennec's cirrhosis                                     | Read code v2  | Primary care   |
| J612000 | Alcoholic fibrosis and sclerosis of liver               | Read code v2  | Primary care   |
| J613.00 | Alcoholic liver damage unspecified                      | Read code v2  | Primary care   |
| J613000 | Alcoholic hepatic failure                               | Read code v2  | Primary care   |
| J617.00 | Alcoholic hepatitis                                     | Read code v2  | Primary care   |
| J617000 | Chronic alcoholic hepatitis                             | Read code v2  | Primary care   |
| K70     | Alcoholic liver disease                                 | ICD-10        | Secondary care |

### **Autoimmune liver disease**

| Code | Description | Coding system | Data source |
|------|-------------|---------------|-------------|
|------|-------------|---------------|-------------|

|                |                                               |              |                |
|----------------|-----------------------------------------------|--------------|----------------|
| <b>J614111</b> | Autoimmune chronic active hepatitis           | Read code v2 | Primary care   |
| <b>J616000</b> | Previously known as primary biliary cirrhosis | Read code v2 | Primary care   |
| <b>J63B.00</b> | Autoimmune hepatitis                          | Read code v2 | Primary care   |
| <b>J661700</b> | Primary sclerosing cholangitis                | Read code v2 | Primary care   |
| <b>K74.3</b>   | Previously known as primary biliary cirrhosis | ICD-10       | Secondary care |
| <b>K75.4</b>   | Autoimmune hepatitis                          | ICD-10       | Secondary care |

## **Viral hepatitis**

| <b>Code</b>    | <b>Description</b>                                                         | <b>Coding system</b> | <b>Data source</b> |
|----------------|----------------------------------------------------------------------------|----------------------|--------------------|
| <b>43B4.00</b> | Hepatitis B surface antigen +ve                                            | Read code v2         | Primary care       |
| <b>43B5.00</b> | Hepatitis e antigen present                                                | Read code v2         | Primary care       |
| <b>43X3.00</b> | Hepatitis C antibody test positive                                         | Read code v2         | Primary care       |
| <b>43j5.00</b> | Hepatitis C nucleic acid detection                                         | Read code v2         | Primary care       |
| <b>43jG.00</b> | Hepatitis B nucleic acid detection                                         | Read code v2         | Primary care       |
| <b>4J3B.00</b> | Hepatitis C viral load                                                     | Read code v2         | Primary care       |
| <b>4J3D.00</b> | Hepatitis B viral load                                                     | Read code v2         | Primary care       |
| <b>4JQ3.00</b> | Hepatitis C virus genotype                                                 | Read code v2         | Primary care       |
| <b>4JQD.00</b> | Hepatitis C viral ribonucleic acid PCR positive                            | Read code v2         | Primary care       |
| <b>4JQD.11</b> | Hepatitis C PCR positive                                                   | Read code v2         | Primary care       |
| <b>4JQF.00</b> | Hepatitis C antigen positive                                               | Read code v2         | Primary care       |
| <b>7Q05200</b> | Hepatitis B treatment drugs Band 1                                         | Read code v2         | Primary care       |
| <b>9kV..00</b> | Hepatitis C screening positive - enhanced services admin                   | Read code v2         | Primary care       |
| <b>9kV..11</b> | Hepatitis C screening positive                                             | Read code v2         | Primary care       |
| <b>9kZ..00</b> | Hepatitis B screening positive - enhanced services admin                   | Read code v2         | Primary care       |
| <b>9kZ..11</b> | Hepatitis B screening positive                                             | Read code v2         | Primary care       |
| <b>A703.00</b> | Viral (serum) hepatitis B                                                  | Read code v2         | Primary care       |
| <b>A705000</b> | Viral hepatitis C without mention of hepatic coma                          | Read code v2         | Primary care       |
| <b>A705100</b> | Acute delta-(super)infection of hepatitis B carrier                        | Read code v2         | Primary care       |
| <b>A707000</b> | Chronic viral hepatitis B with delta-agent                                 | Read code v2         | Primary care       |
| <b>A707100</b> | Chronic viral hepatitis B without delta-agent                              | Read code v2         | Primary care       |
| <b>A707200</b> | Chronic viral hepatitis C                                                  | Read code v2         | Primary care       |
| <b>A707300</b> | Chronic viral hepatitis B                                                  | Read code v2         | Primary care       |
| <b>A70A.00</b> | Hepatitis C genotype 1                                                     | Read code v2         | Primary care       |
| <b>A70B.00</b> | Hepatitis C genotype 2                                                     | Read code v2         | Primary care       |
| <b>A70C.00</b> | Hepatitis C genotype 3                                                     | Read code v2         | Primary care       |
| <b>A70D.00</b> | Hepatitis C genotype 4                                                     | Read code v2         | Primary care       |
| <b>A70z000</b> | Hepatitis C                                                                | Read code v2         | Primary care       |
| <b>Q409100</b> | Congenital hepatitis B infection                                           | Read code v2         | Primary care       |
| <b>B18.0</b>   | Chronic viral hepatitis B with delta-agent                                 | ICD-10               | Secondary care     |
| <b>B18.1</b>   | Chronic viral hepatitis B without delta-agent, Chronic (viral) hepatitis B | ICD-10               | Secondary care     |
| <b>B18.2</b>   | Chronic viral hepatitis C                                                  | ICD-10               | Secondary care     |
